# Supplementary material
Source: publisher figshare collection journal article supplement (https://acs.figshare.com/ndownloader/files/5133898)

**Fluoro, Alkylsulfanyl, and Alkylsulfonyl Leaving Groups in Suzuki  
Cross-Coupling Reactions of Purine 2'-Deoxynucleosides and  
Nucleosides**

**Jiangqiong Liu and Morris J. Robins<sup>\*</sup>**

Department of Chemistry and Biochemistry, Brigham Young University,  
Provo, Utah-84602-5700  
Morris\_robins@byu.edu

**Supporting Information 2**

Pages S9–S32: Unreported <sup>1</sup>H and <sup>13</sup>C NMR spectra of compounds in the order presented in  
Supporting Information 1 (scanned as jpeg images)

Page S33: <sup>1</sup>H NMR spectrum of **1d** with solvent impurity designated (scanned as a pdf image)

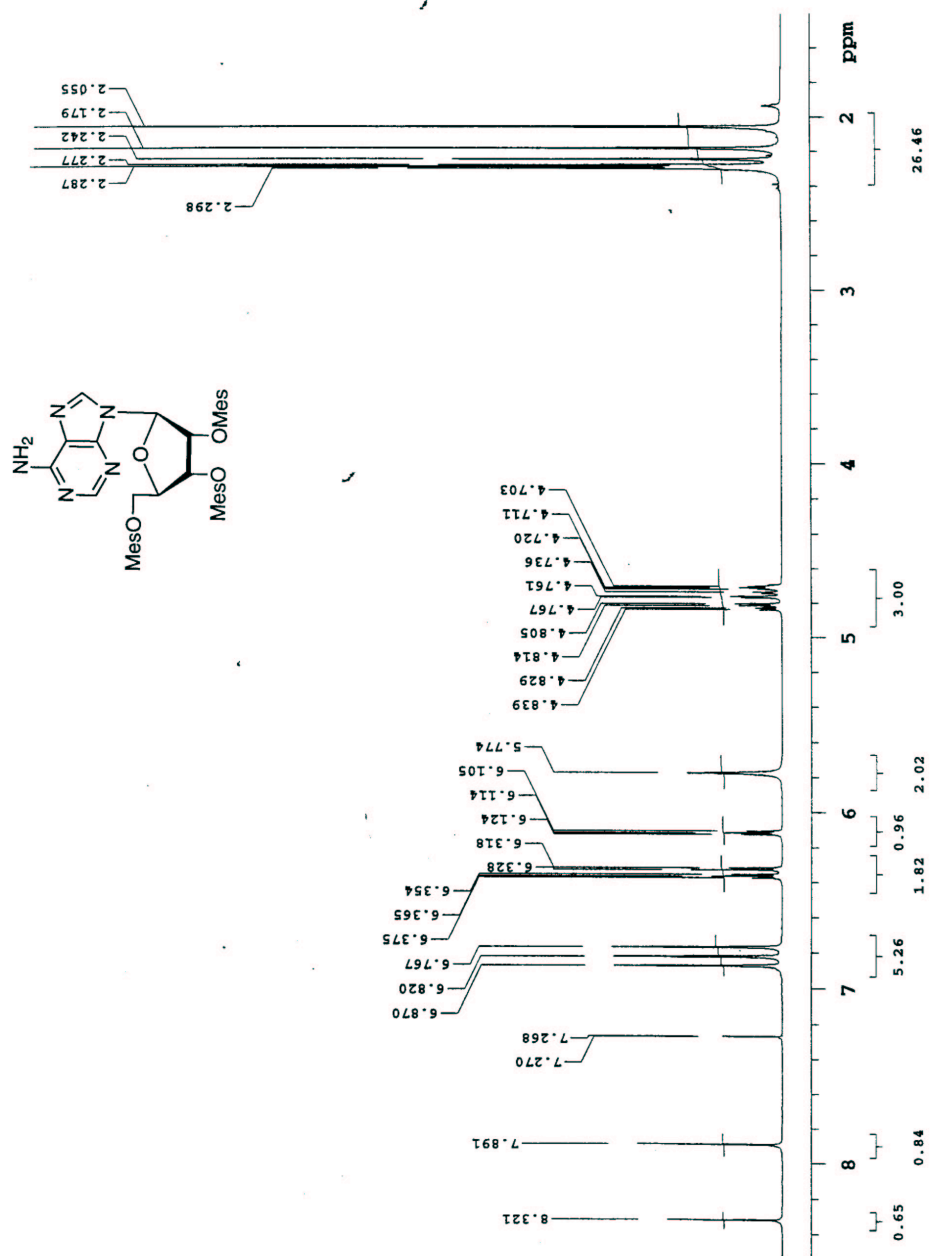

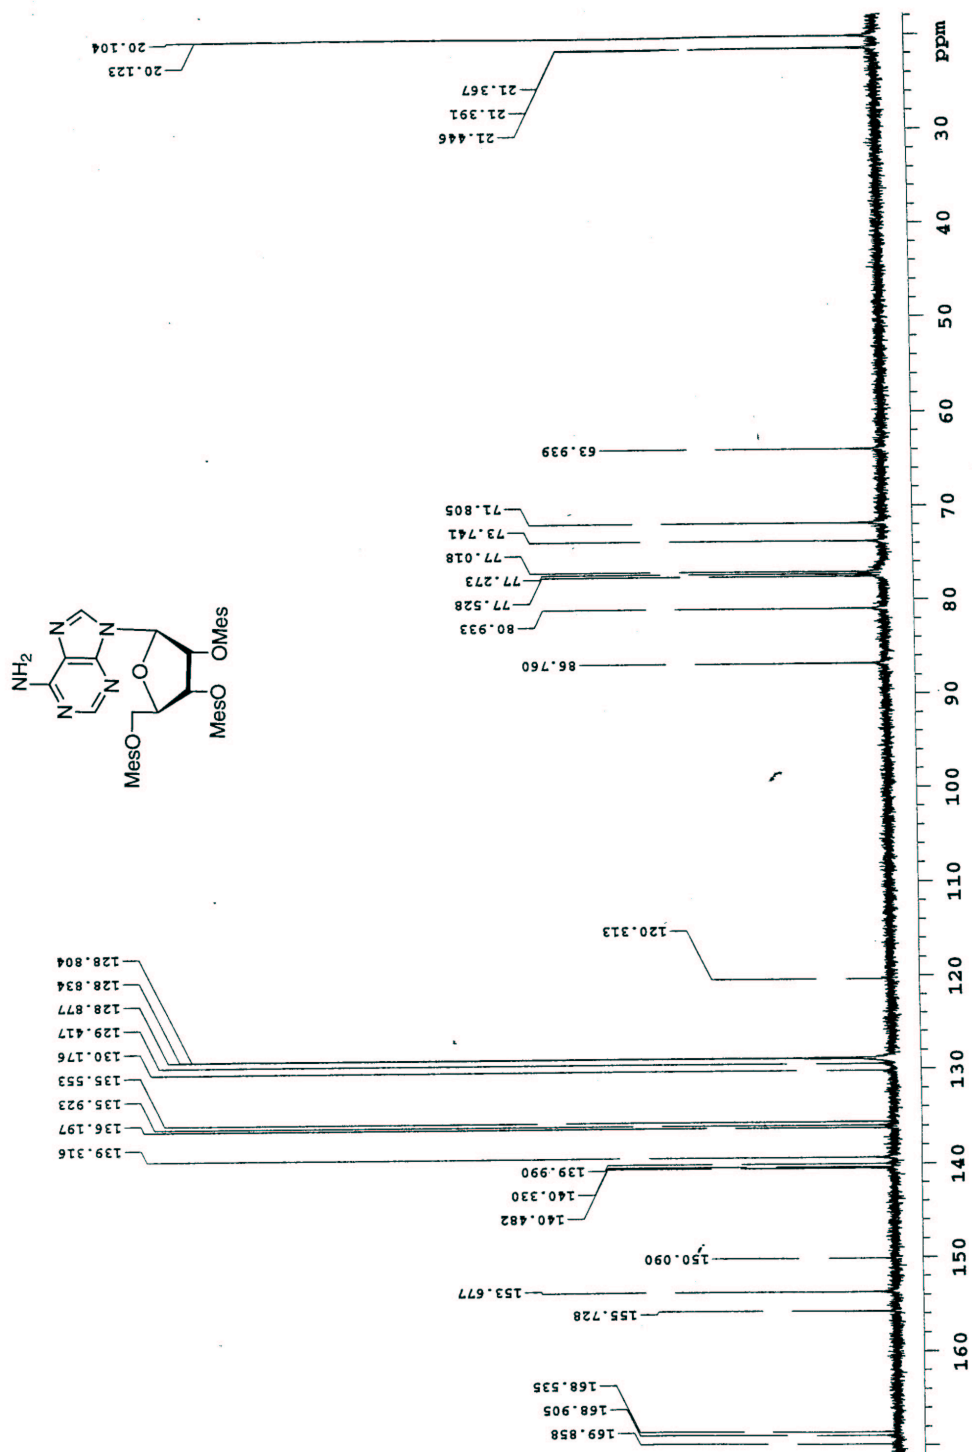

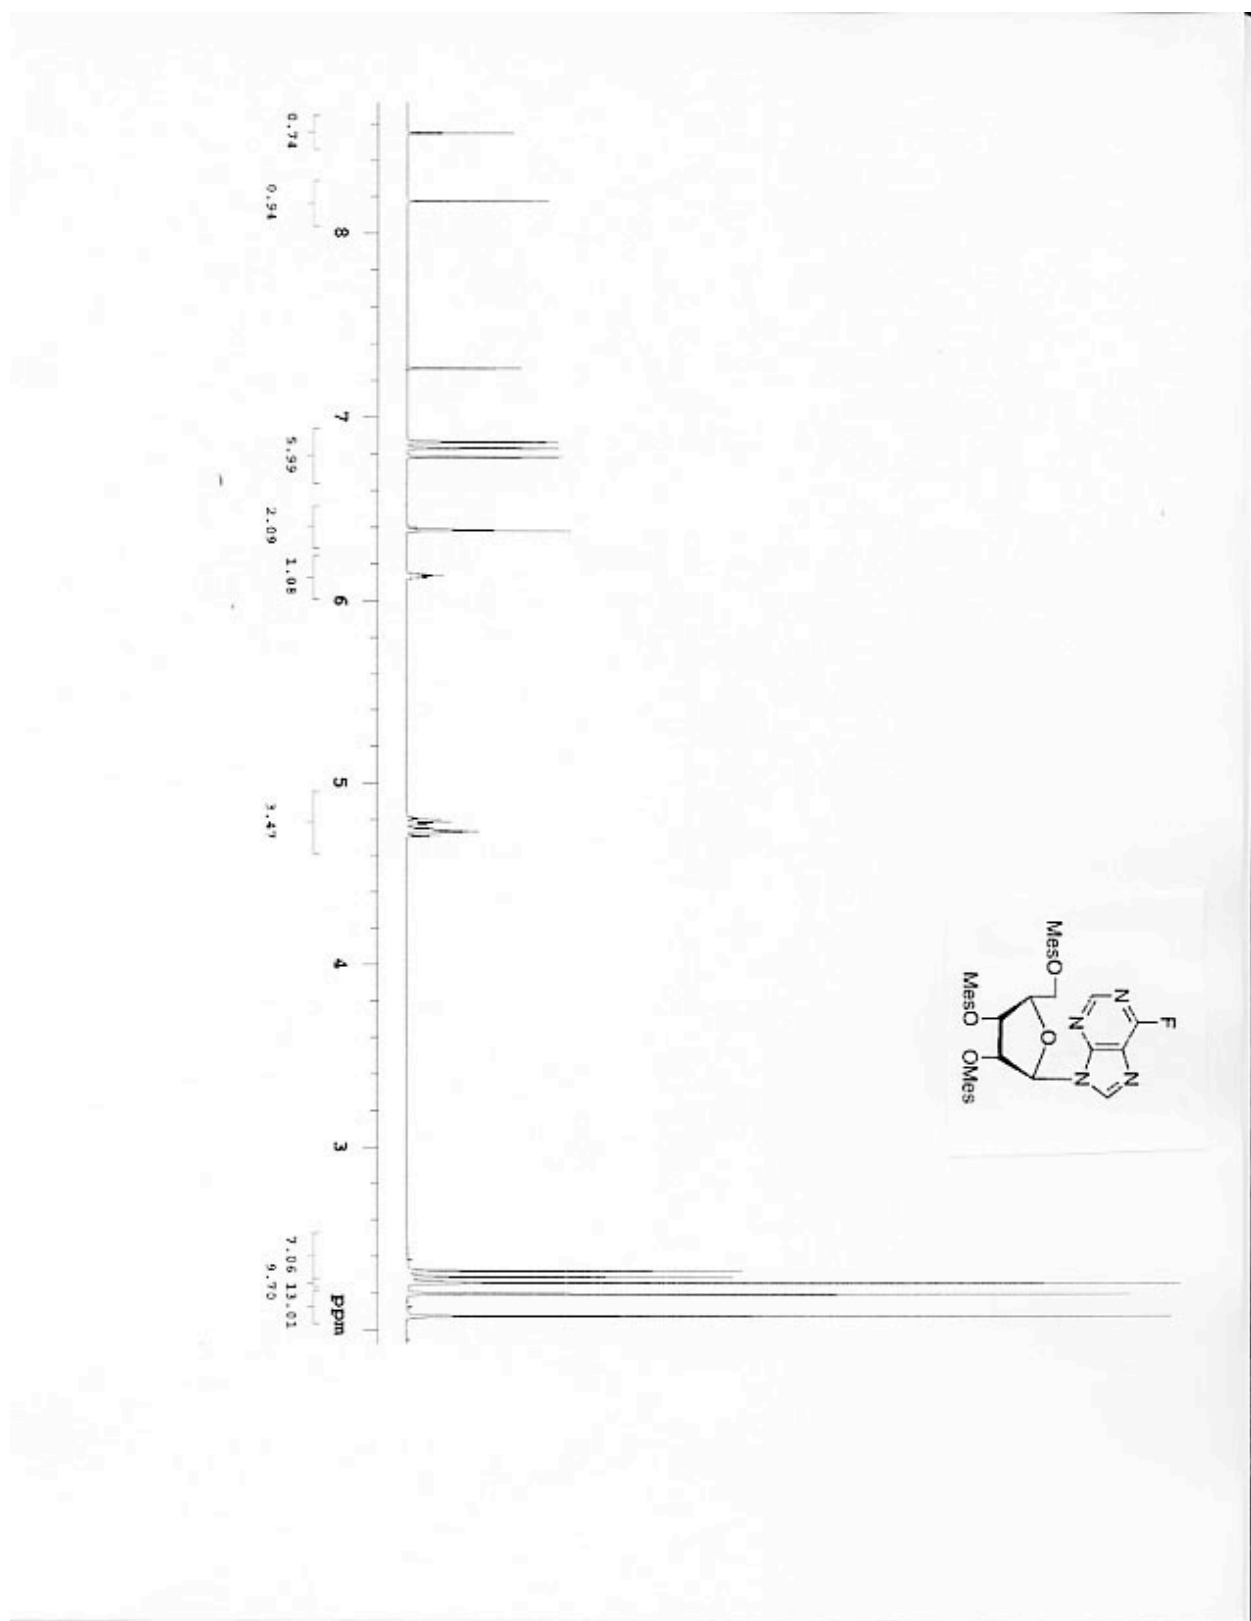

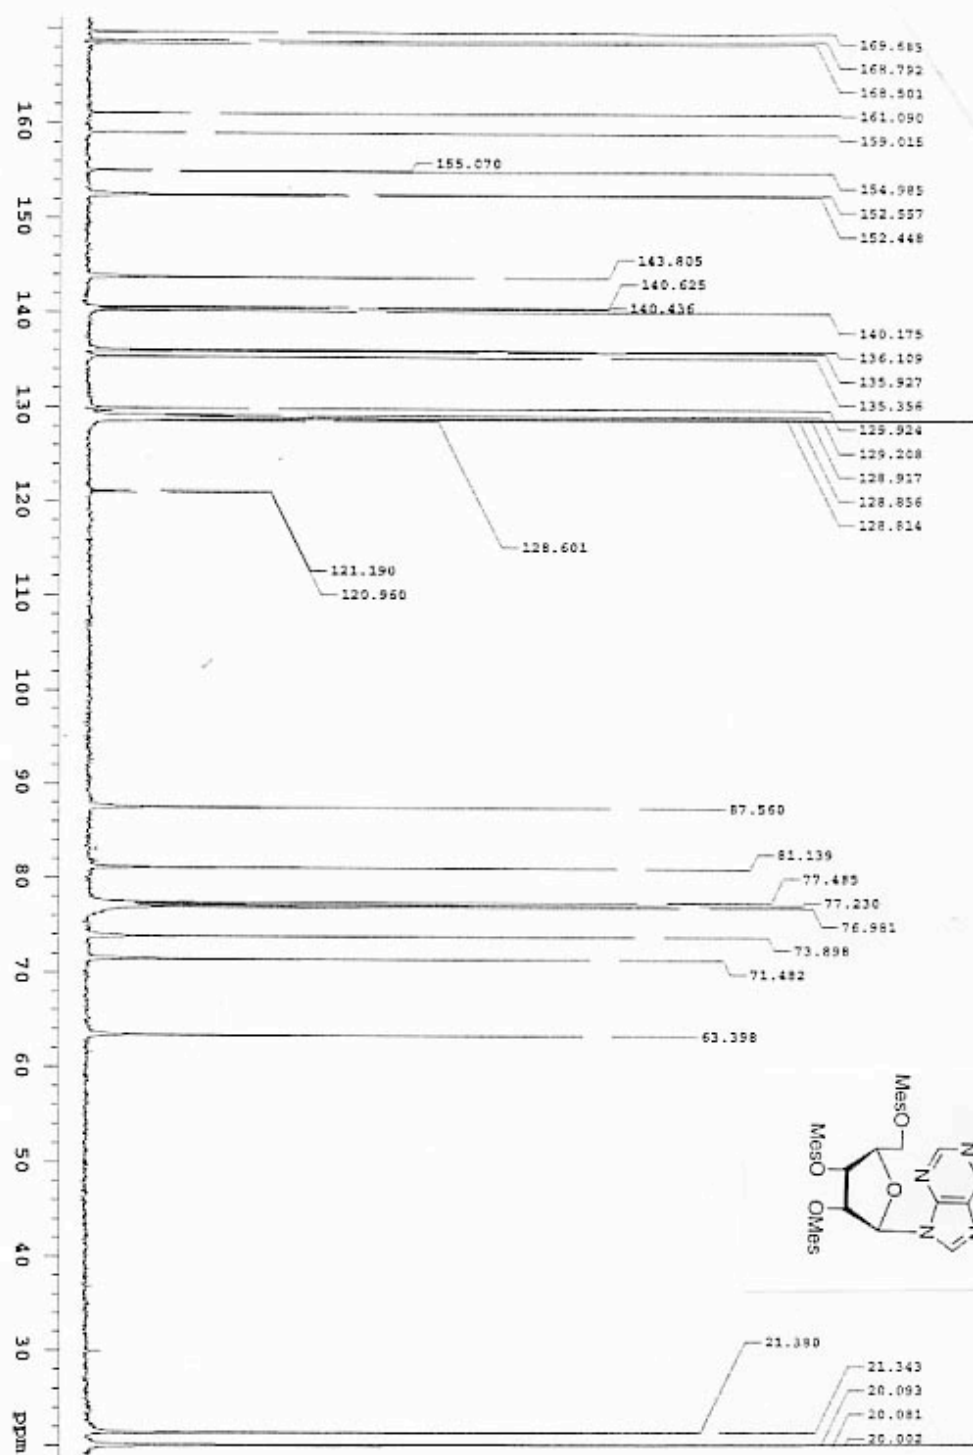

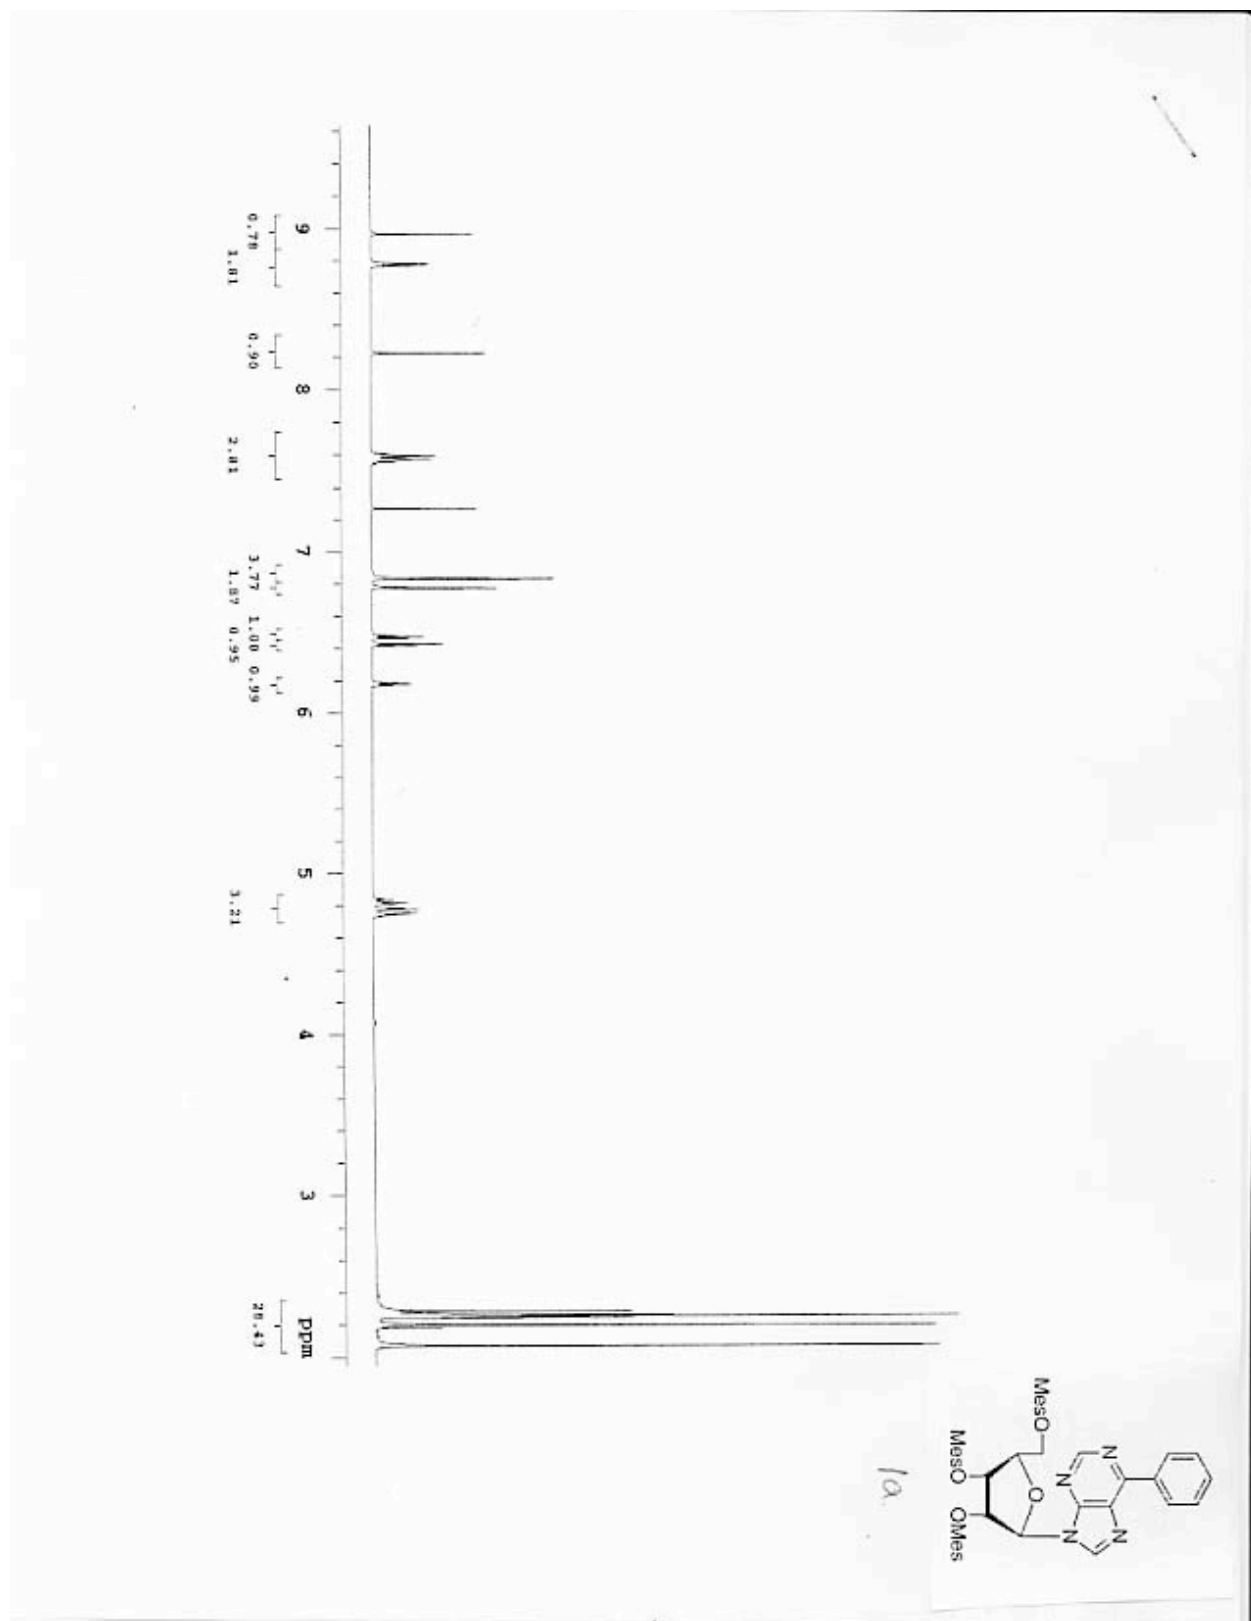

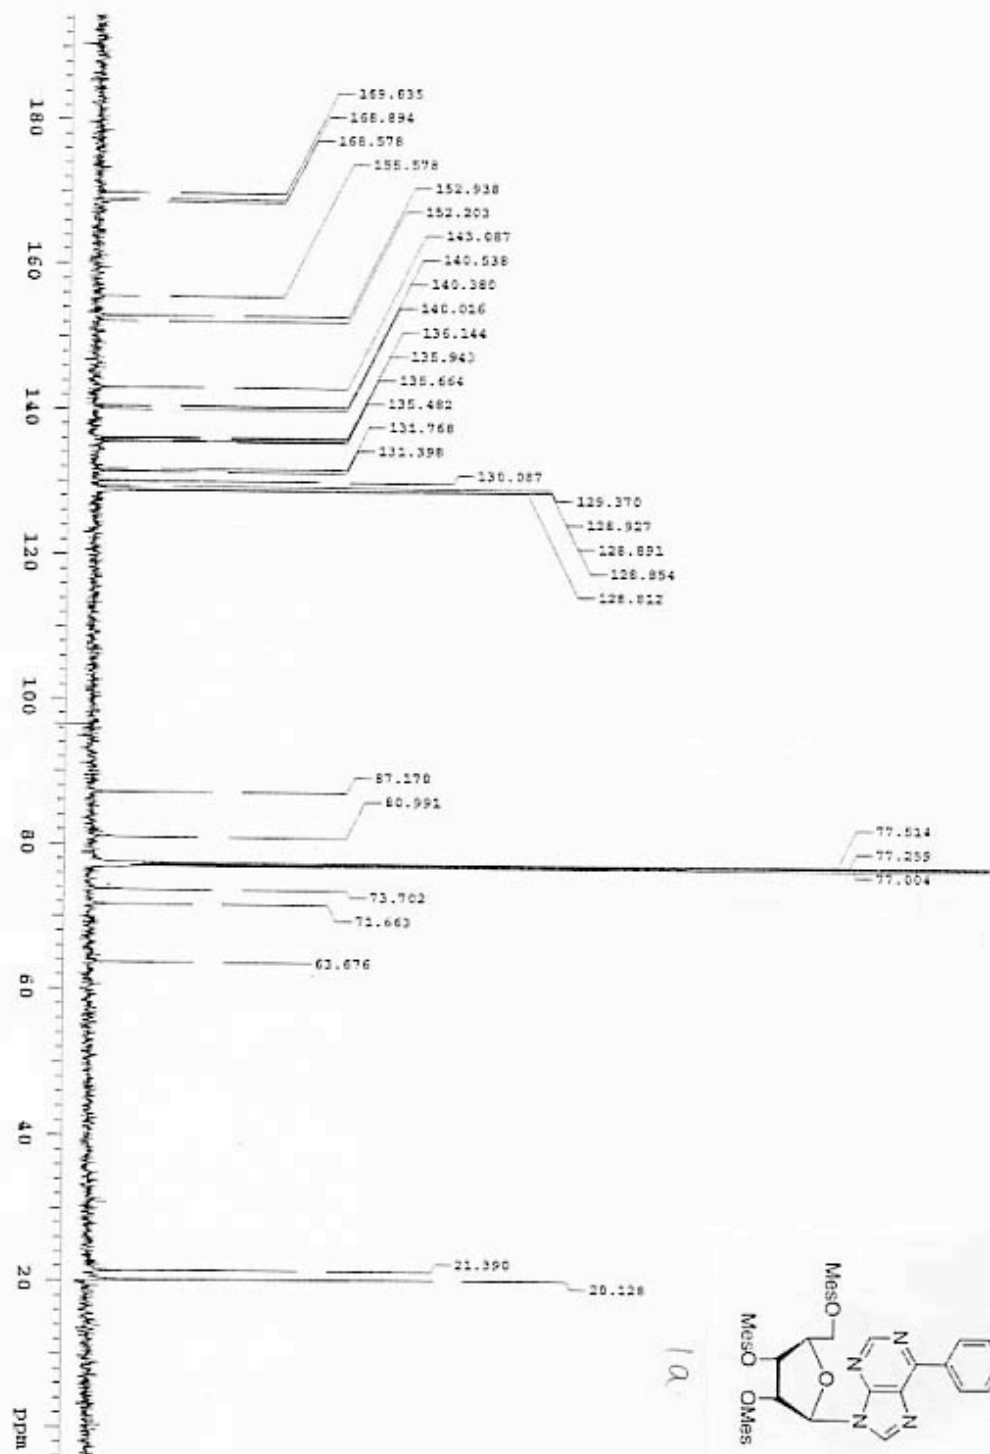

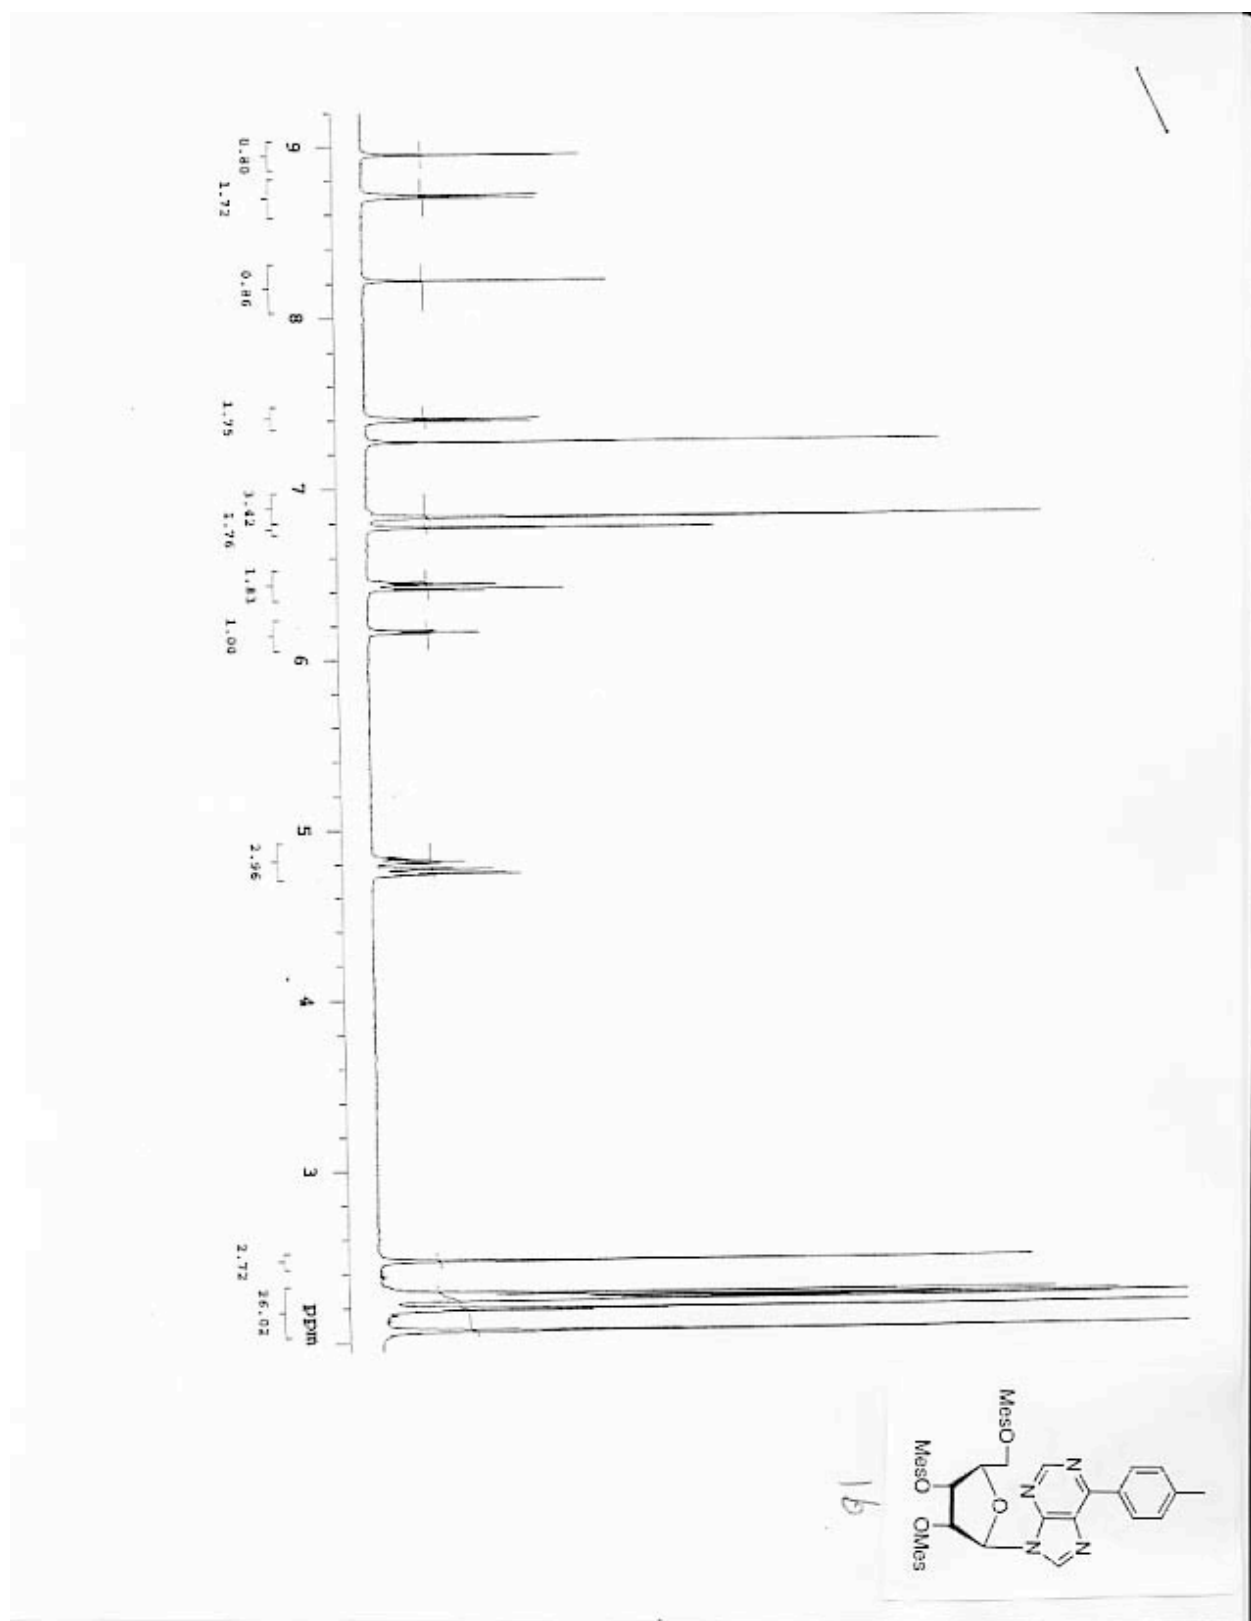



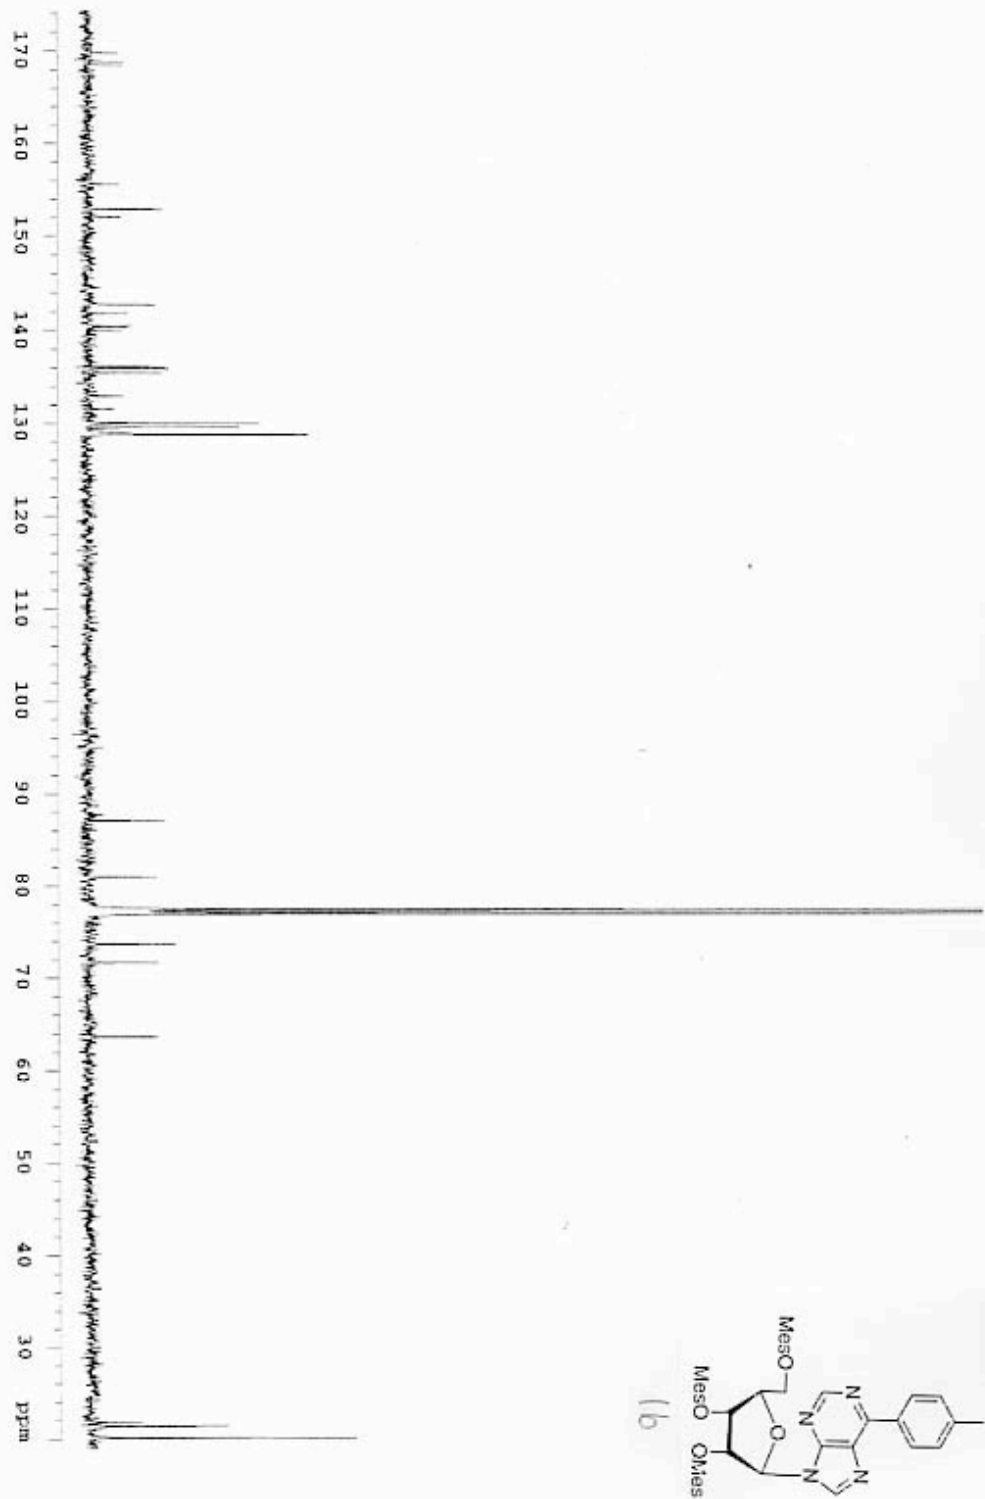

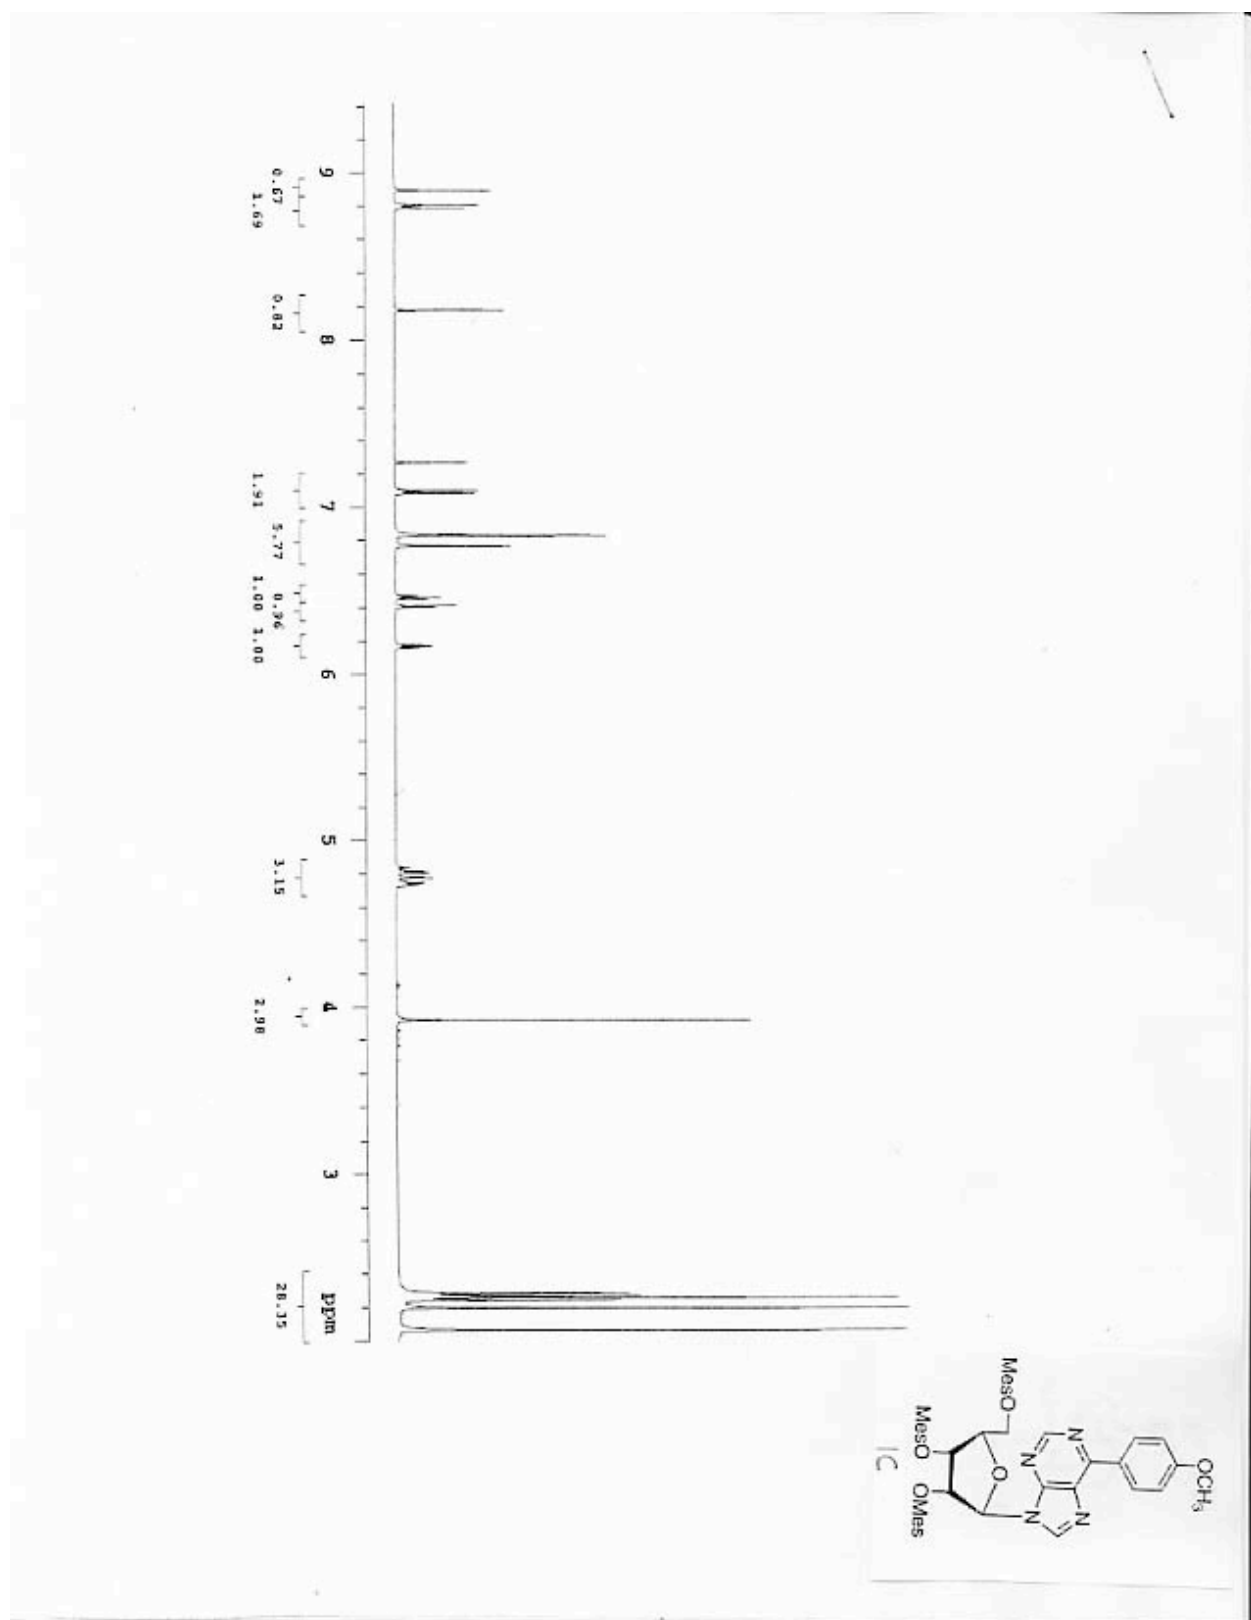

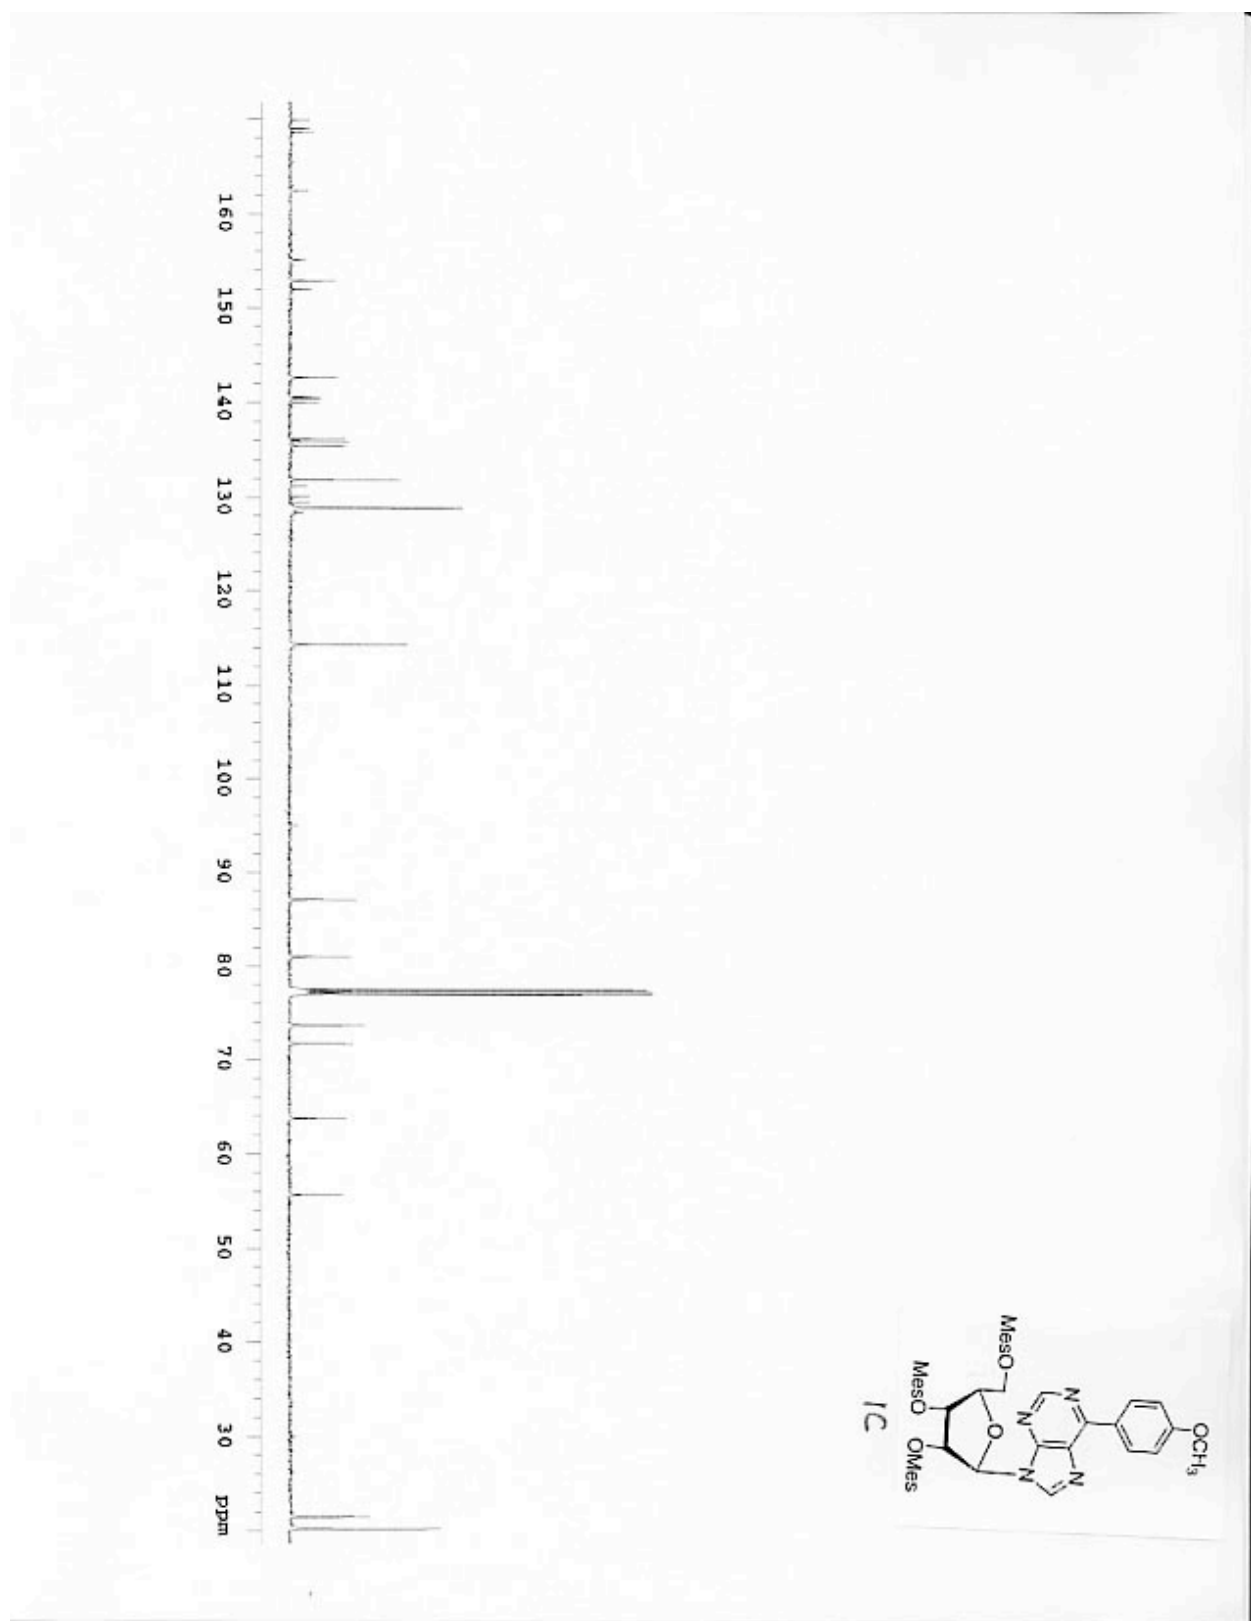

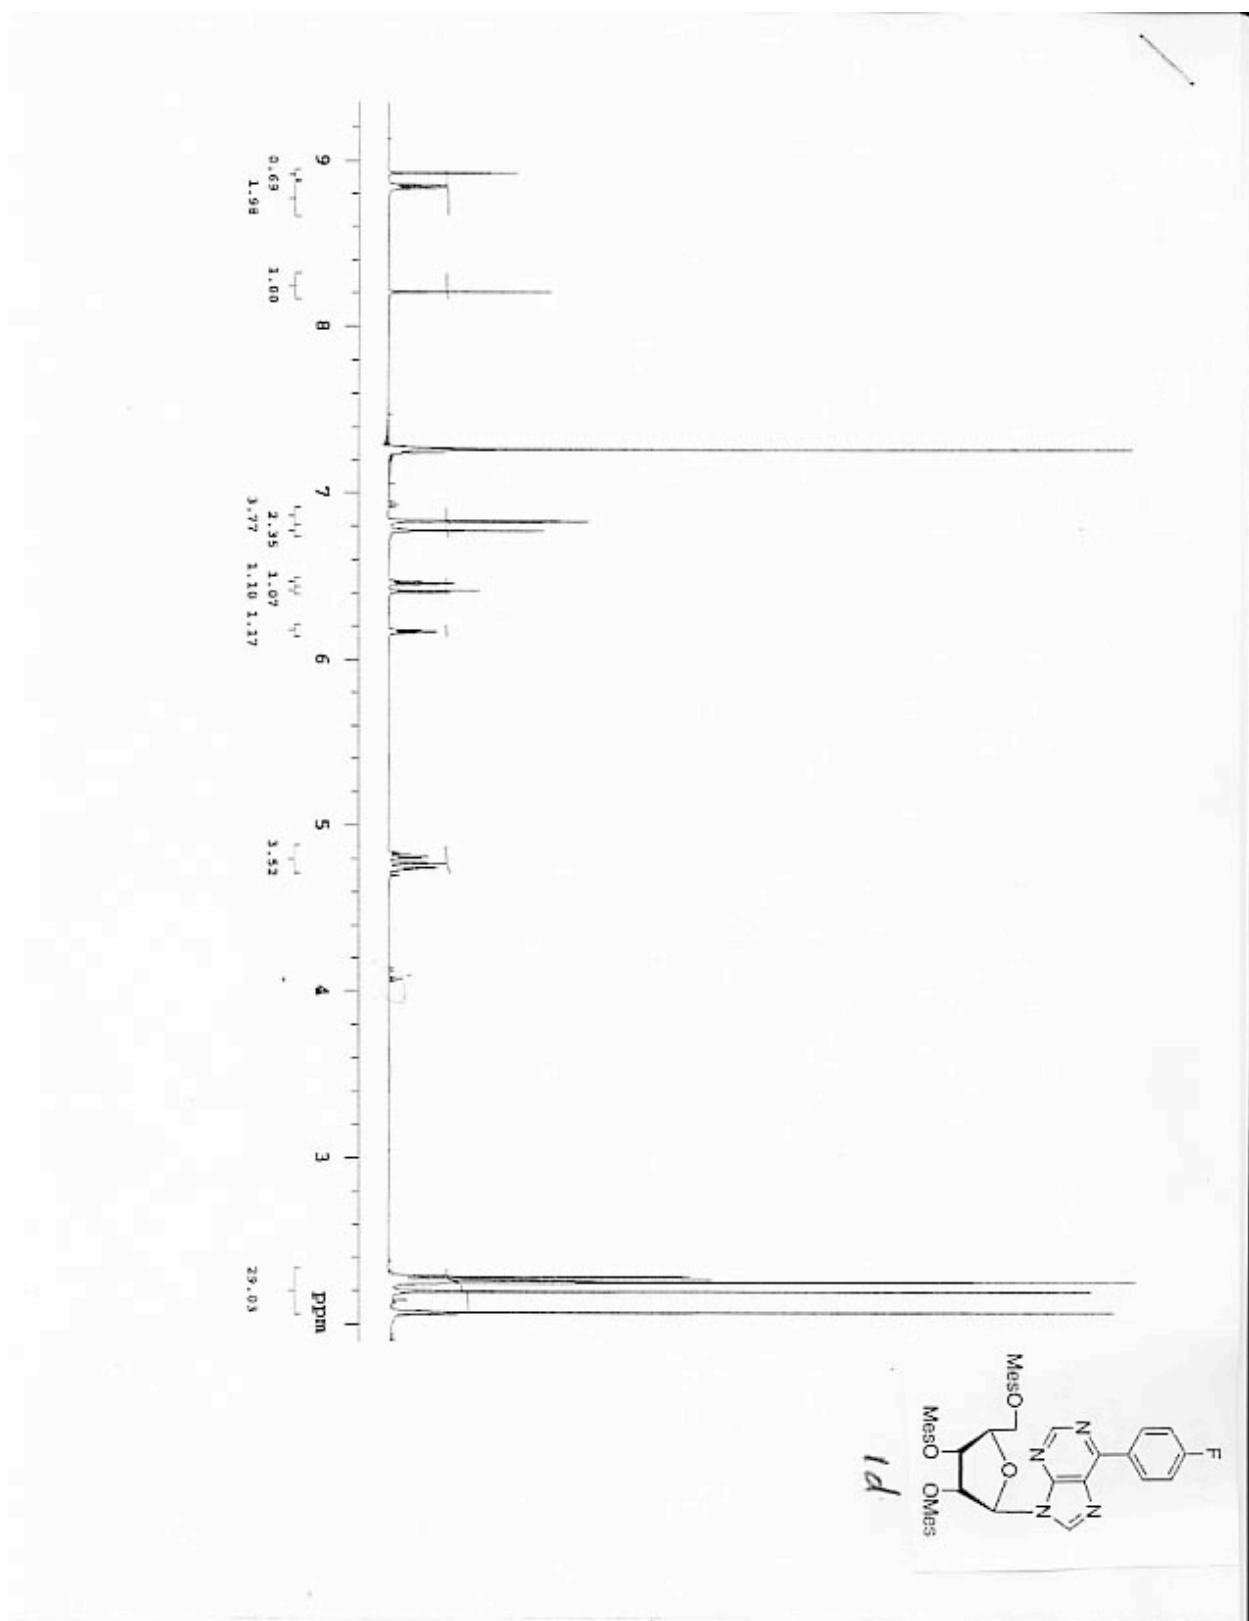

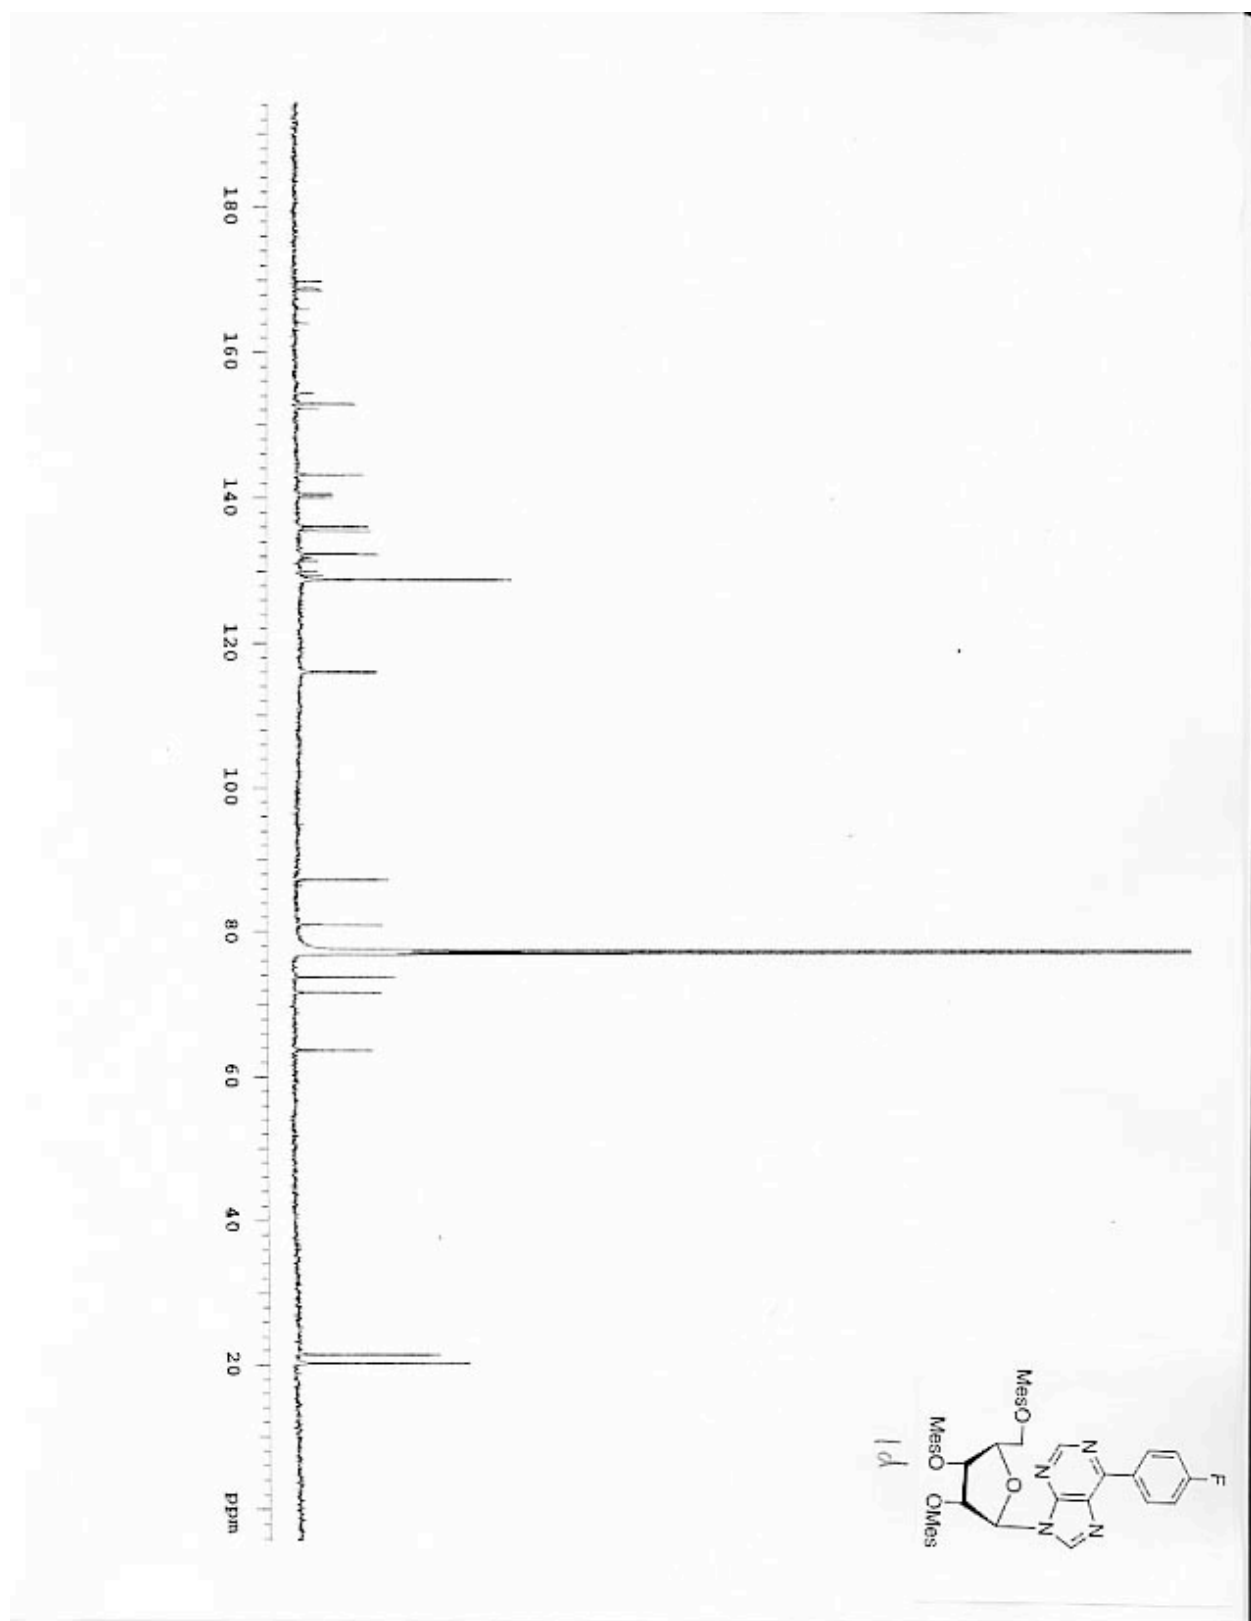

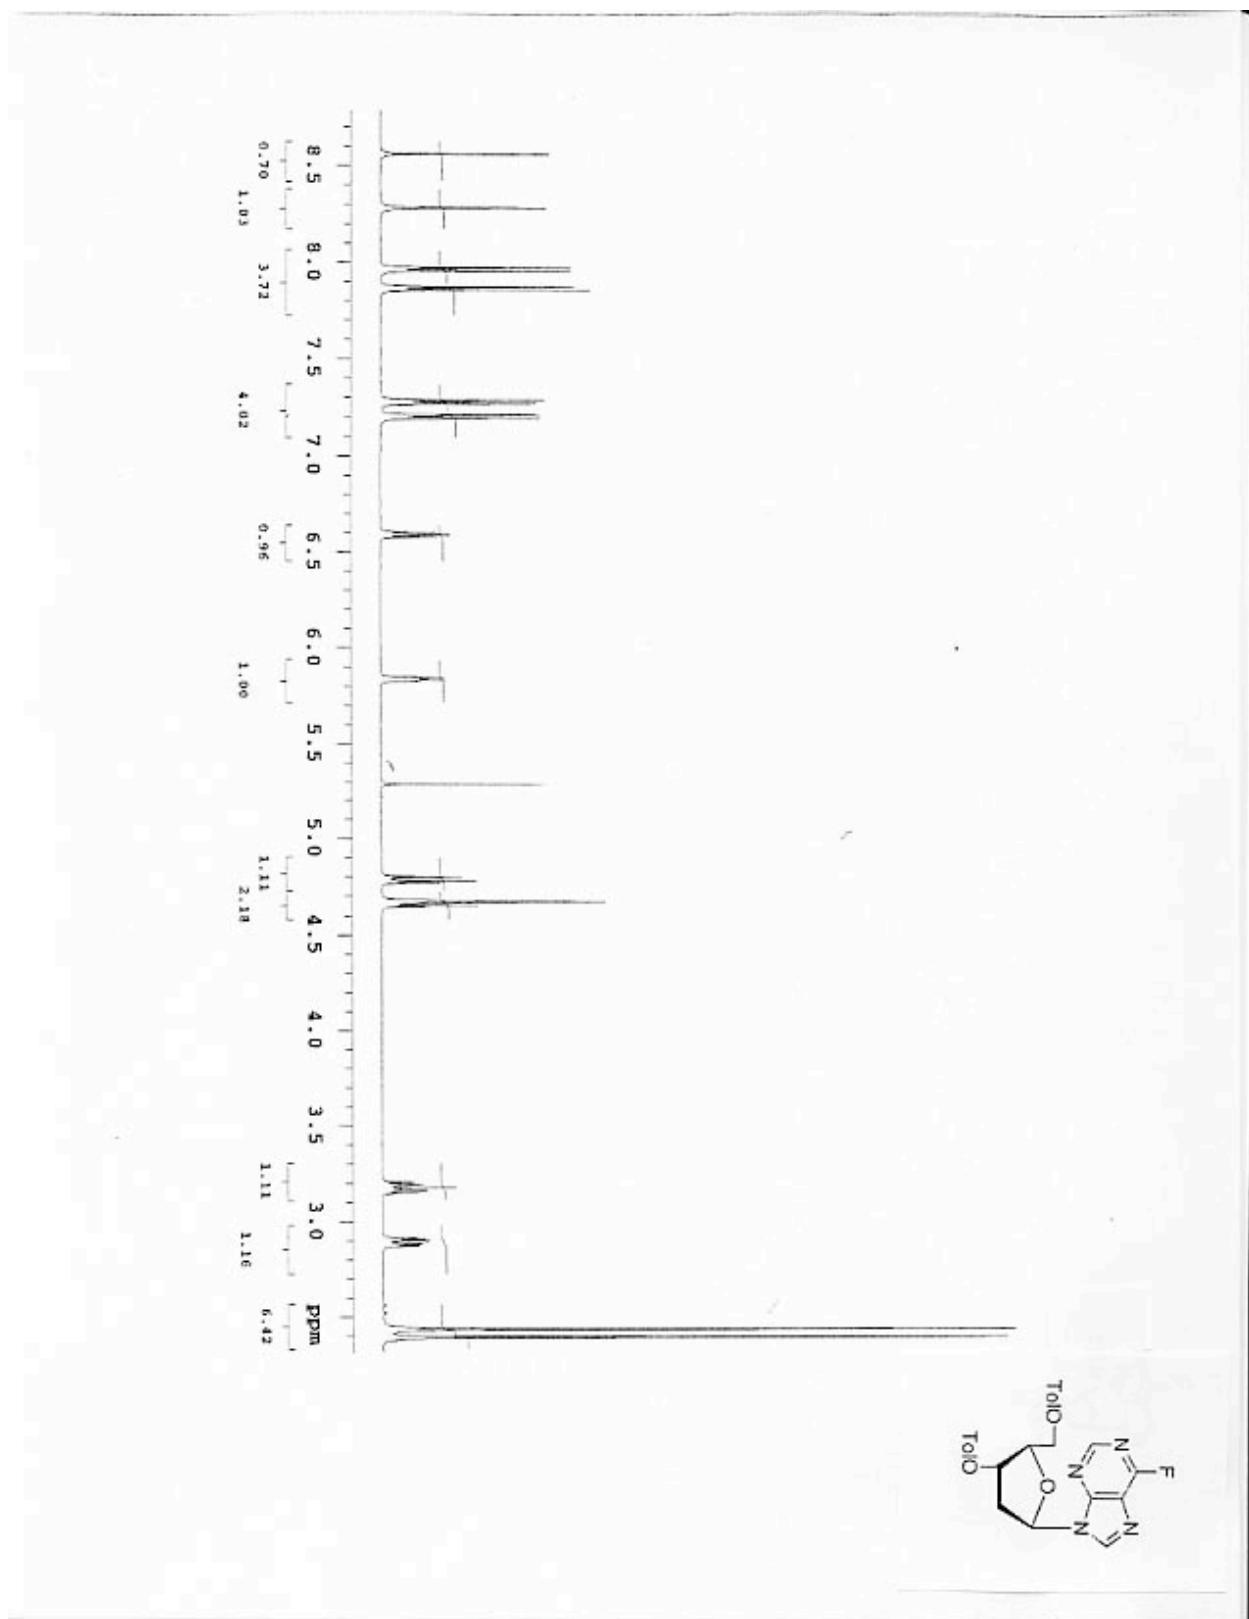

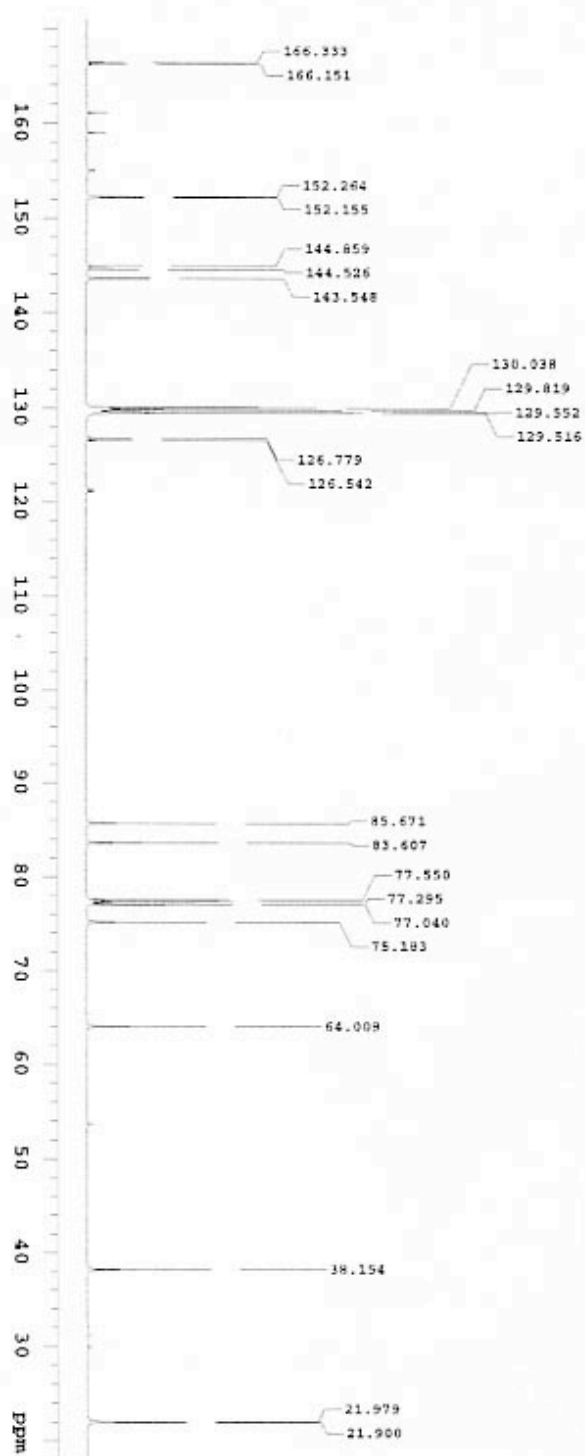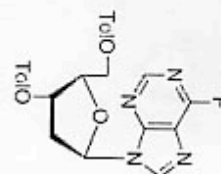

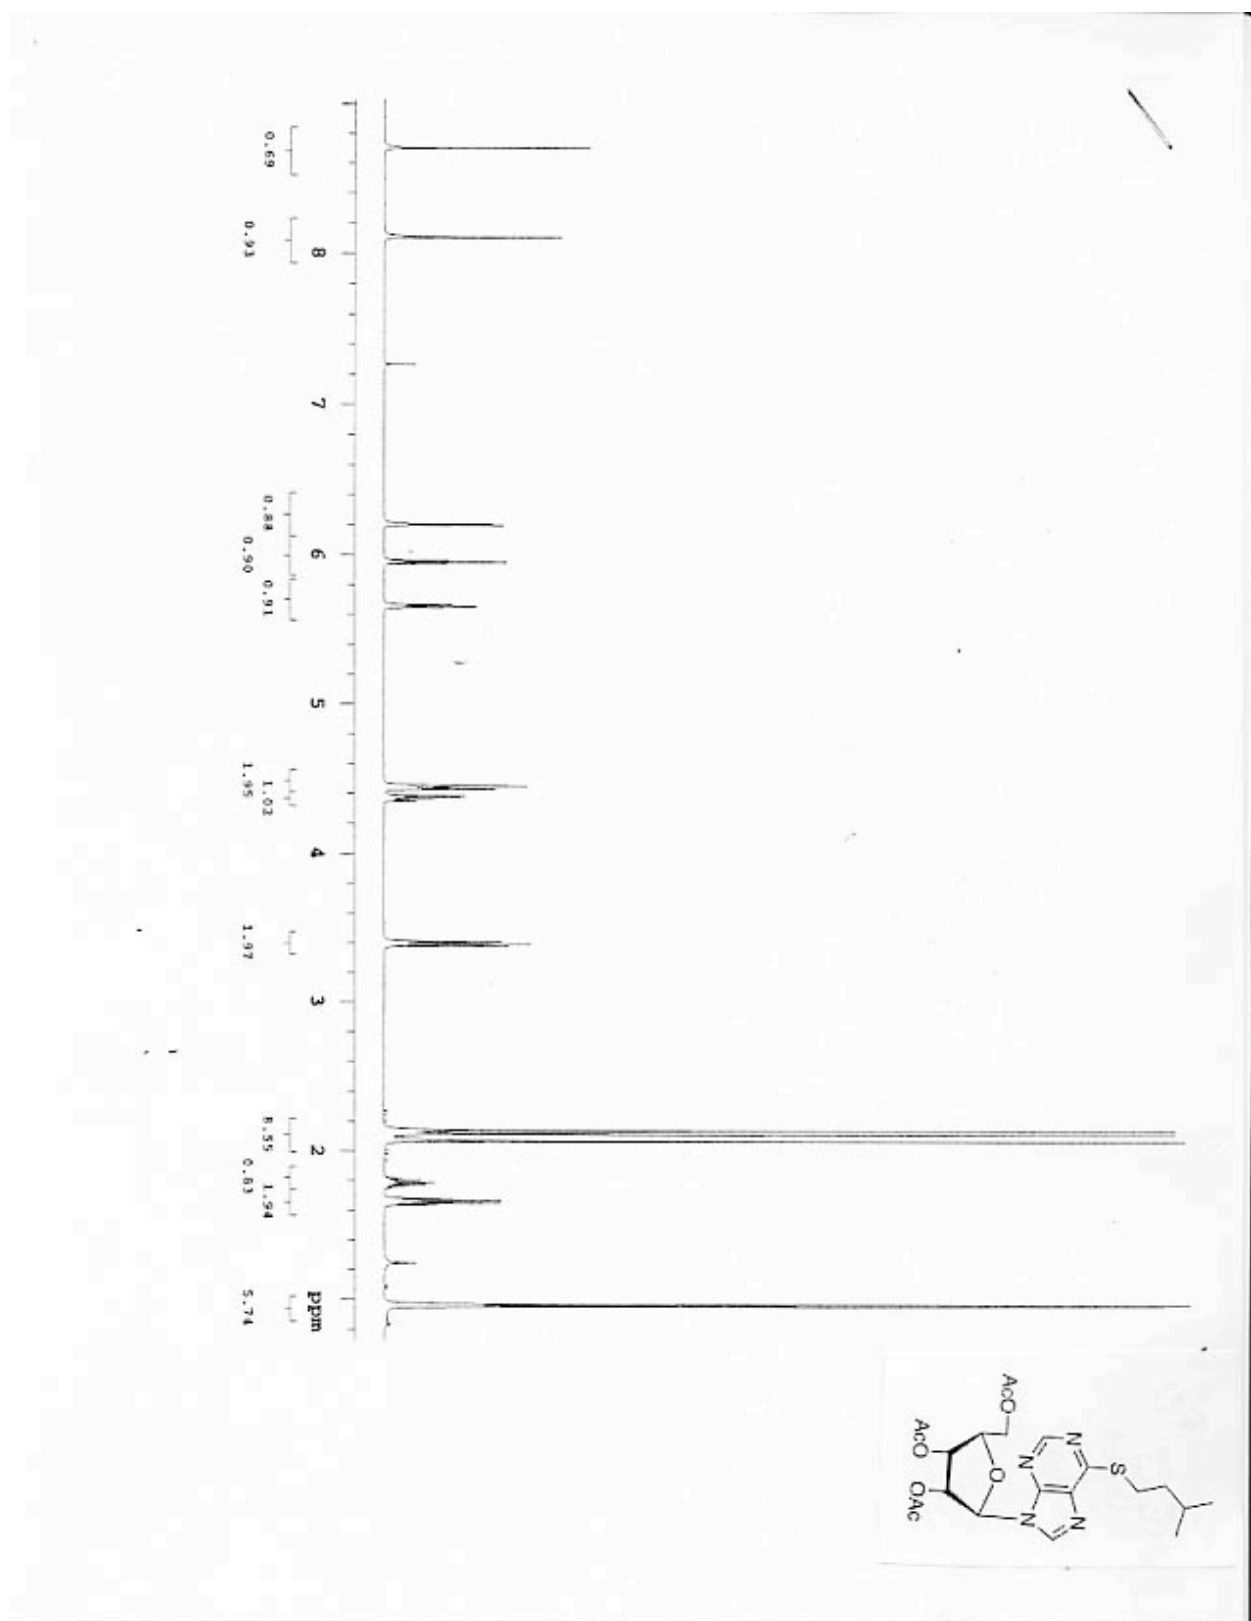



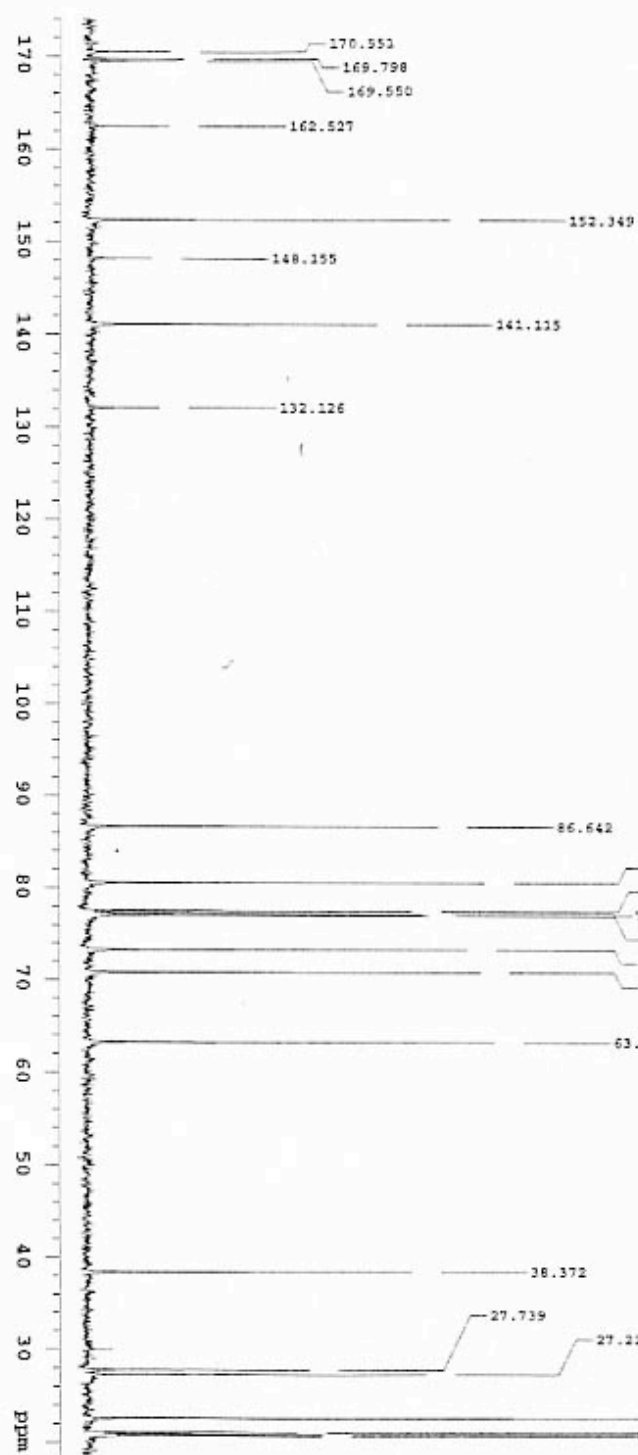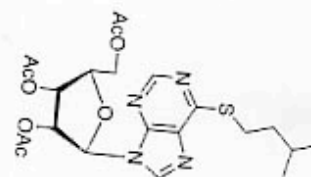

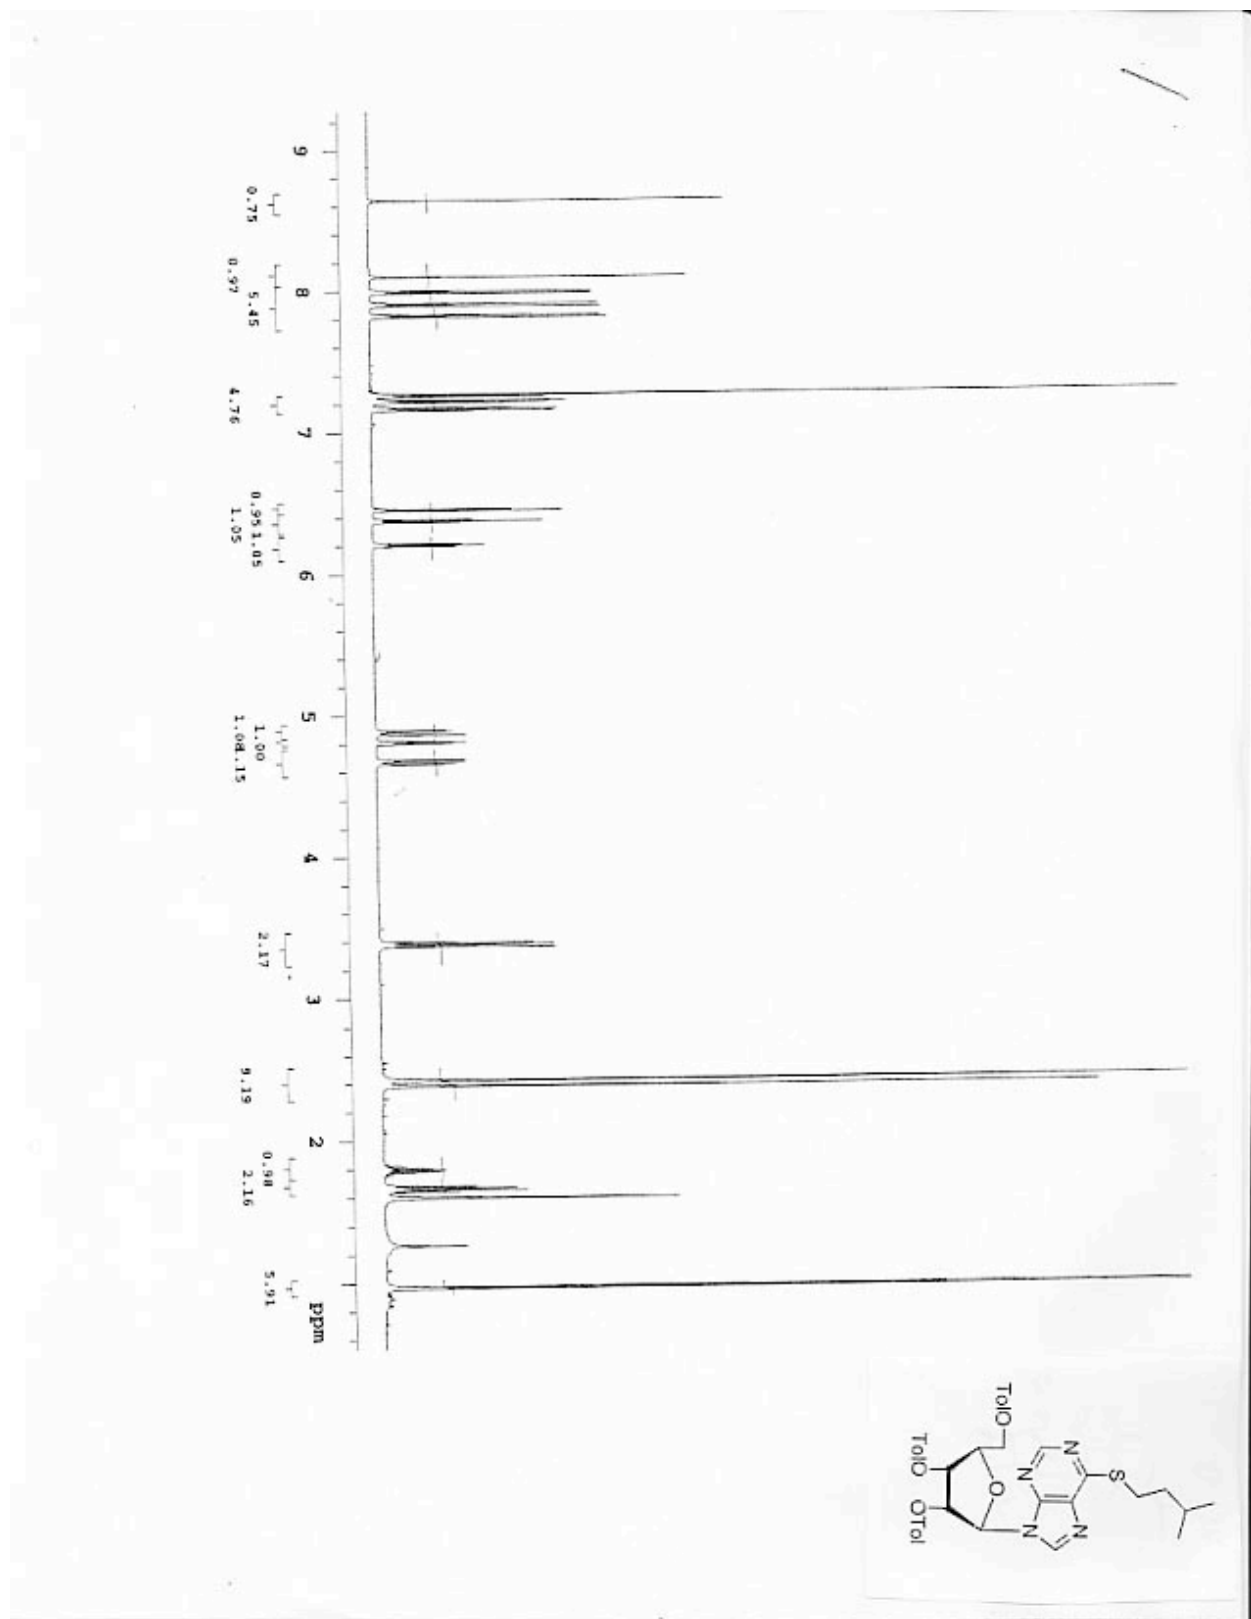

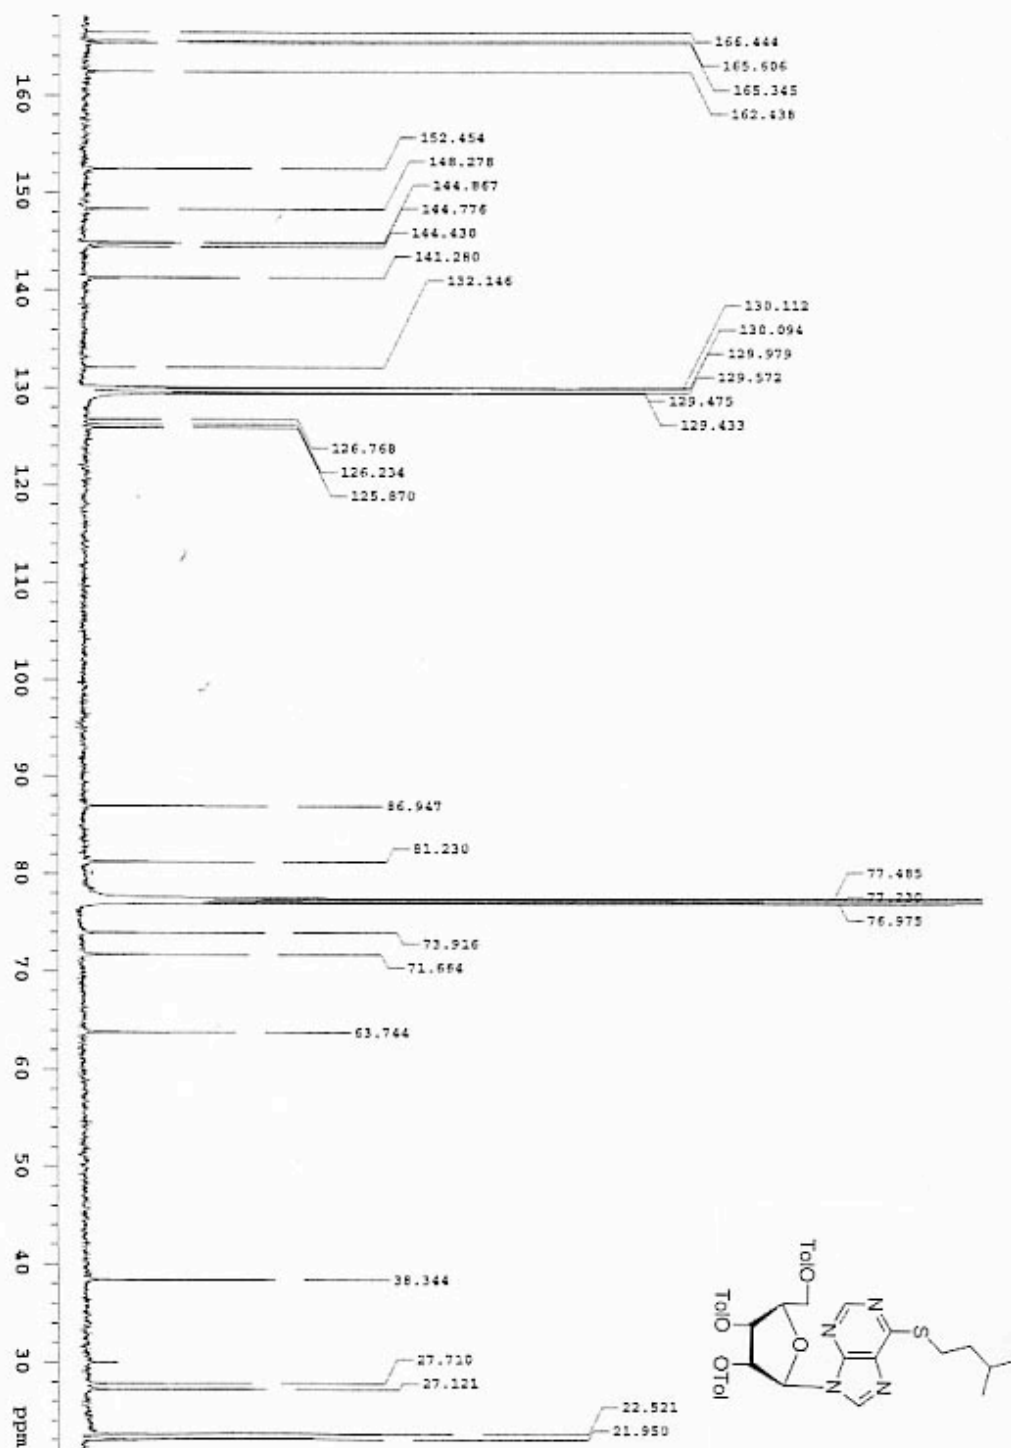

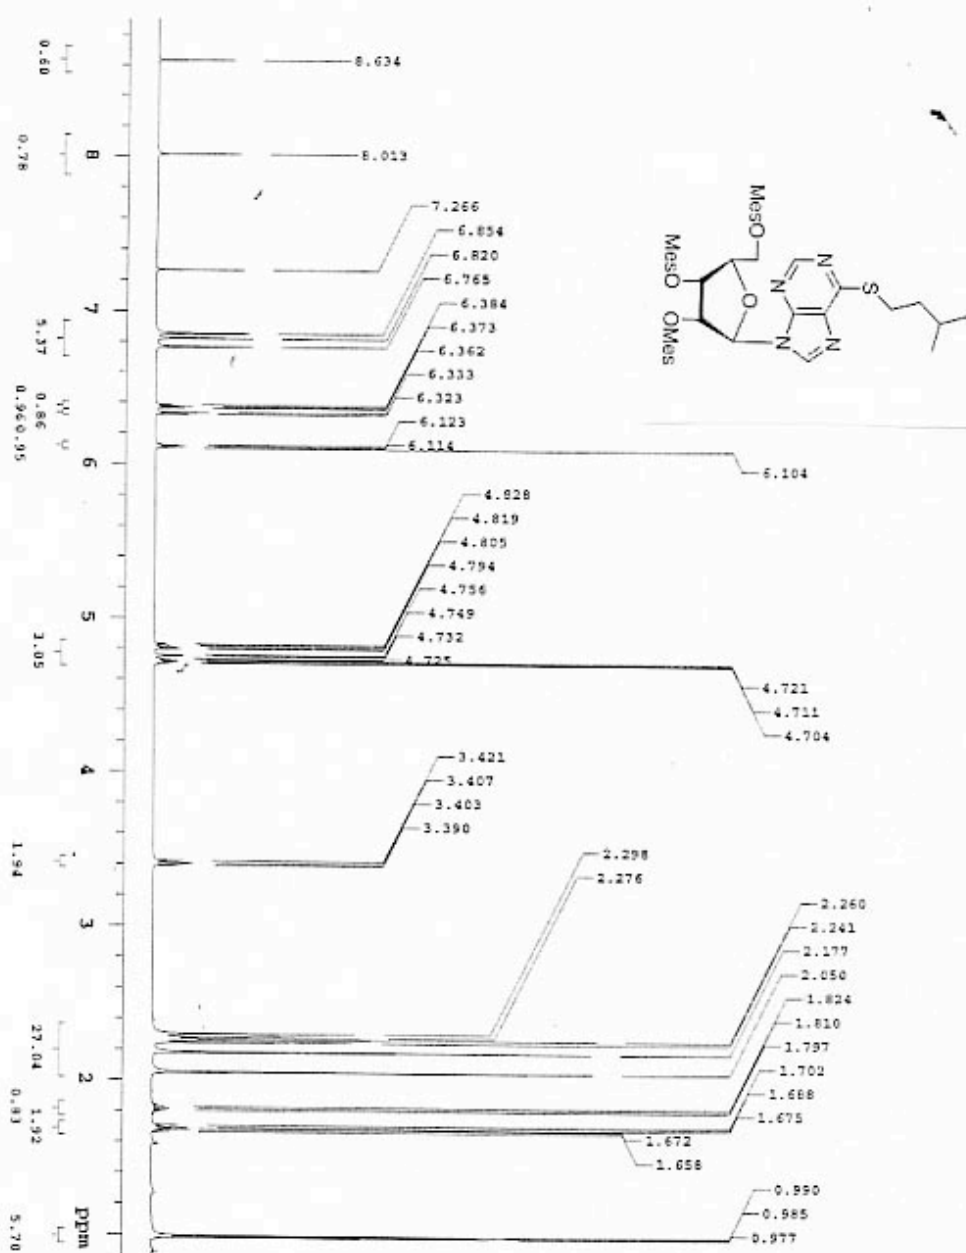

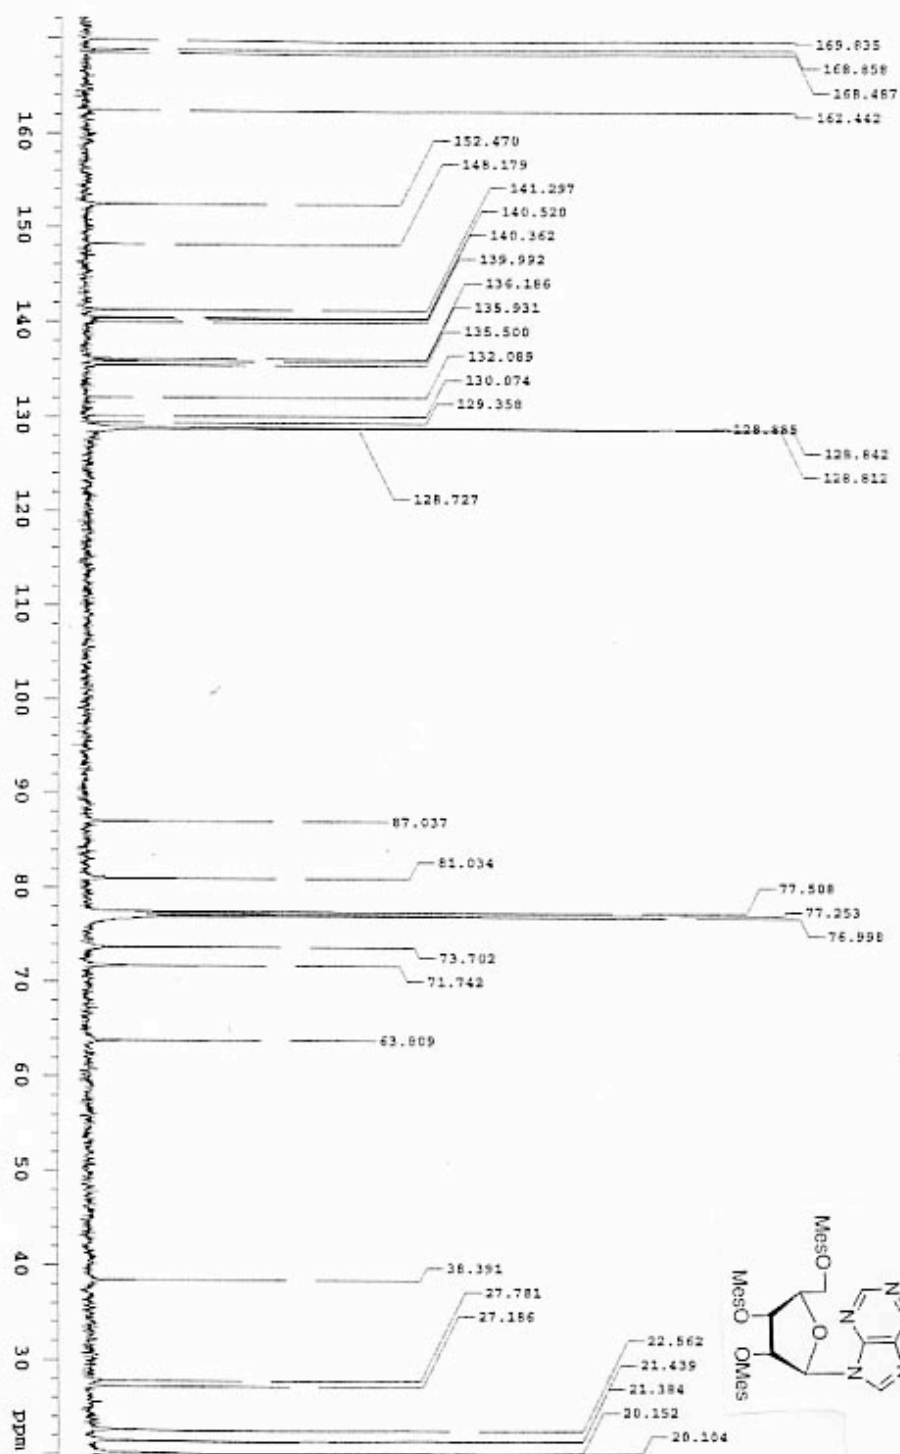

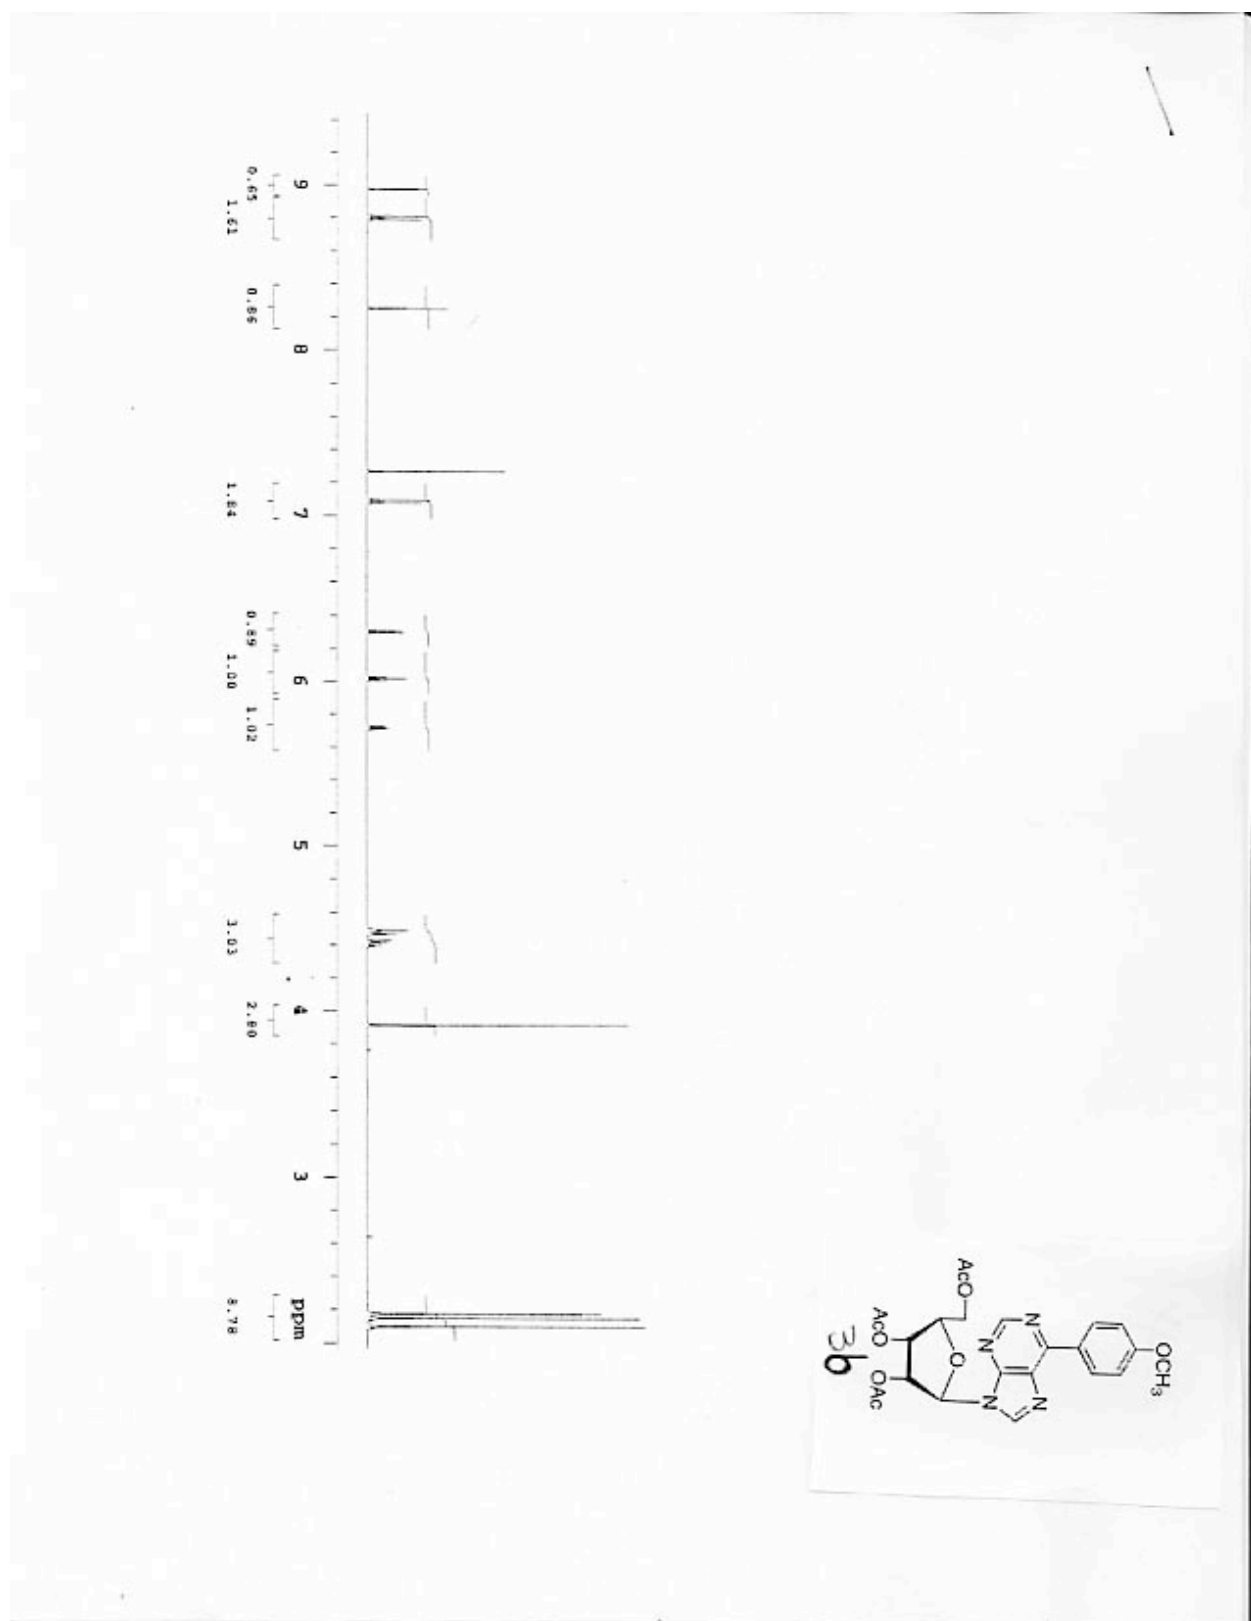

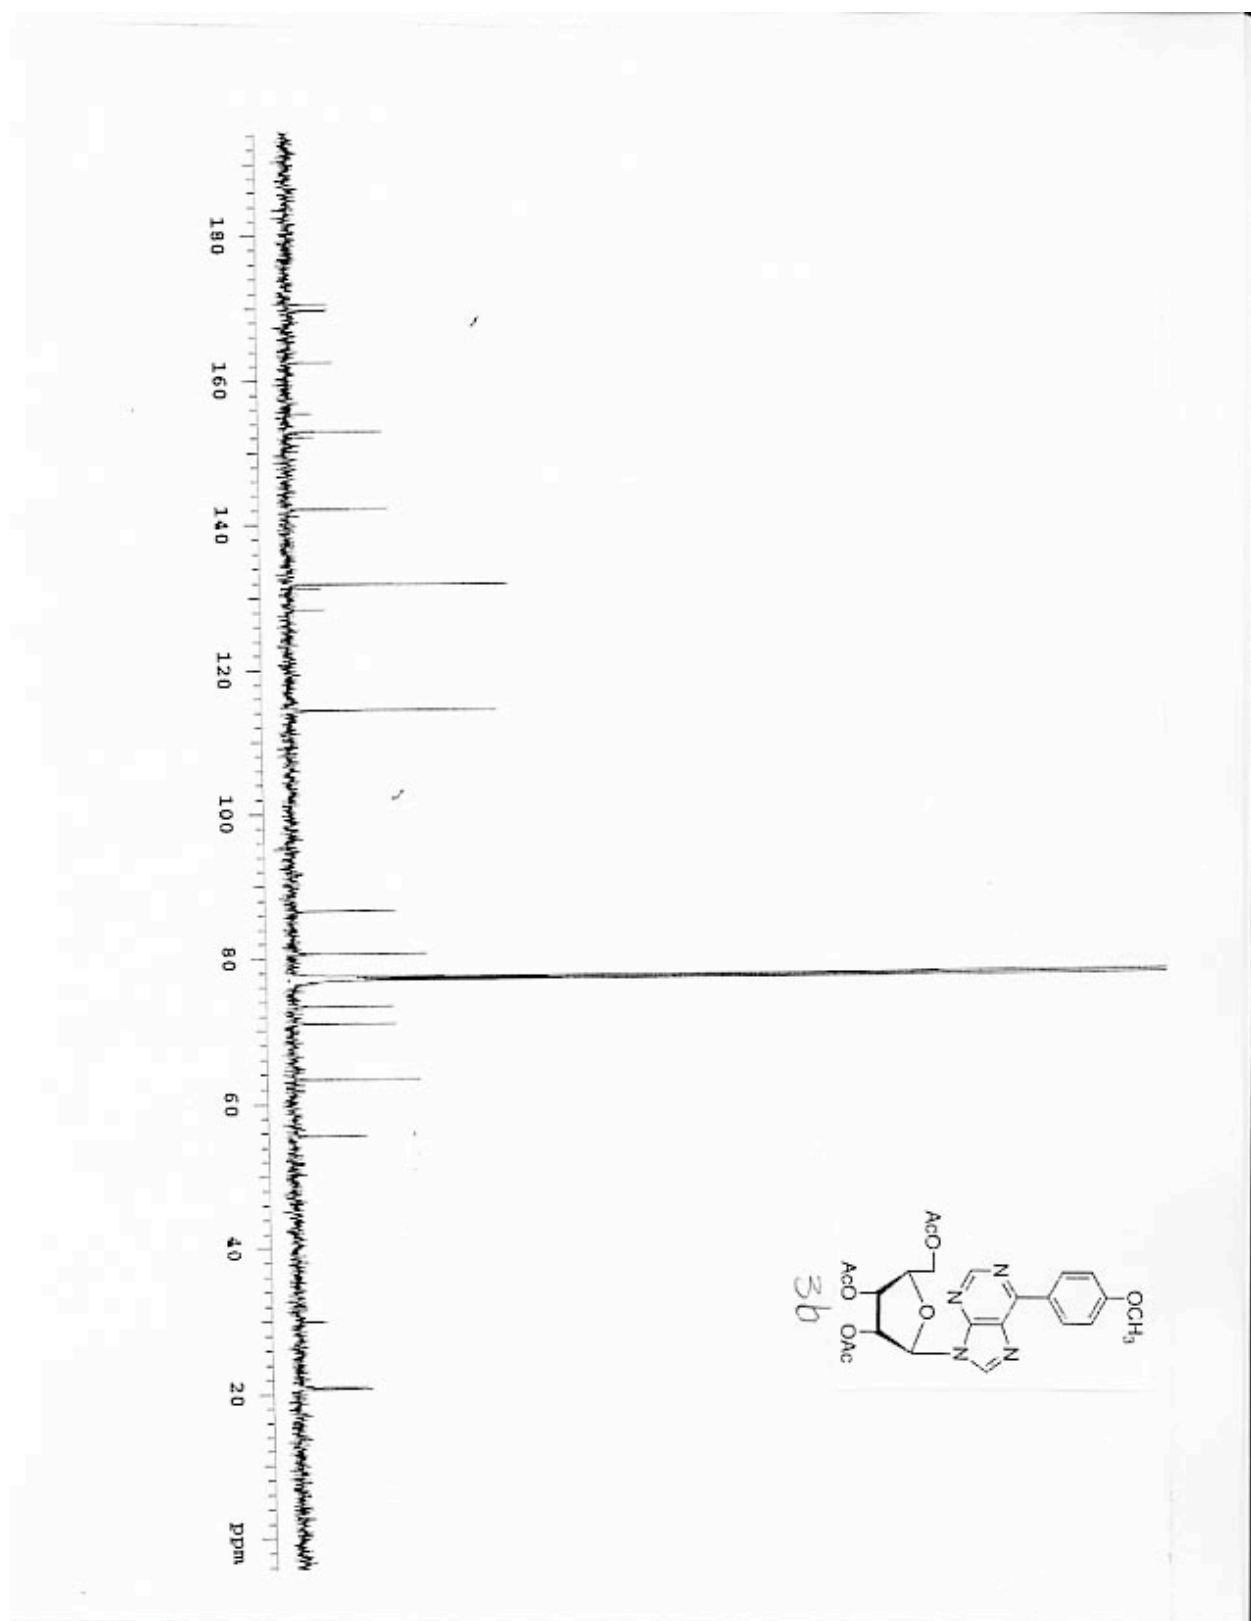

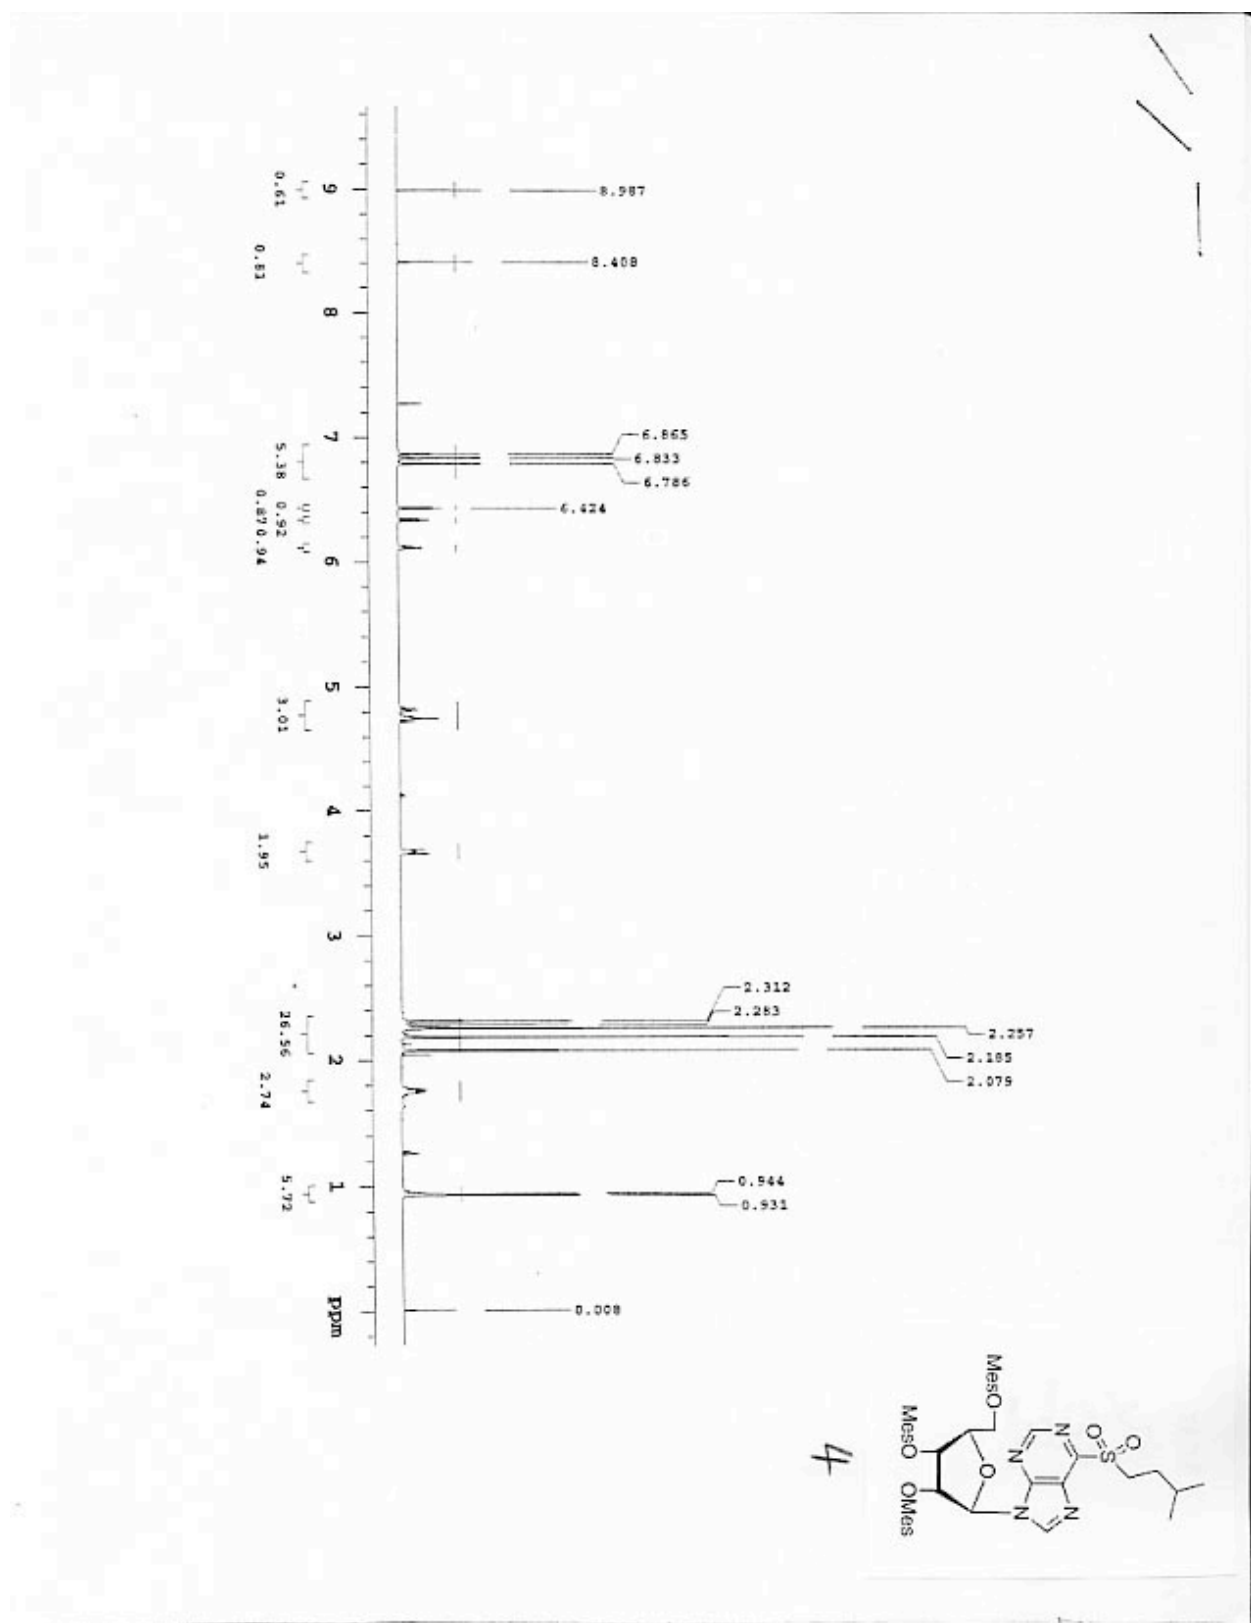



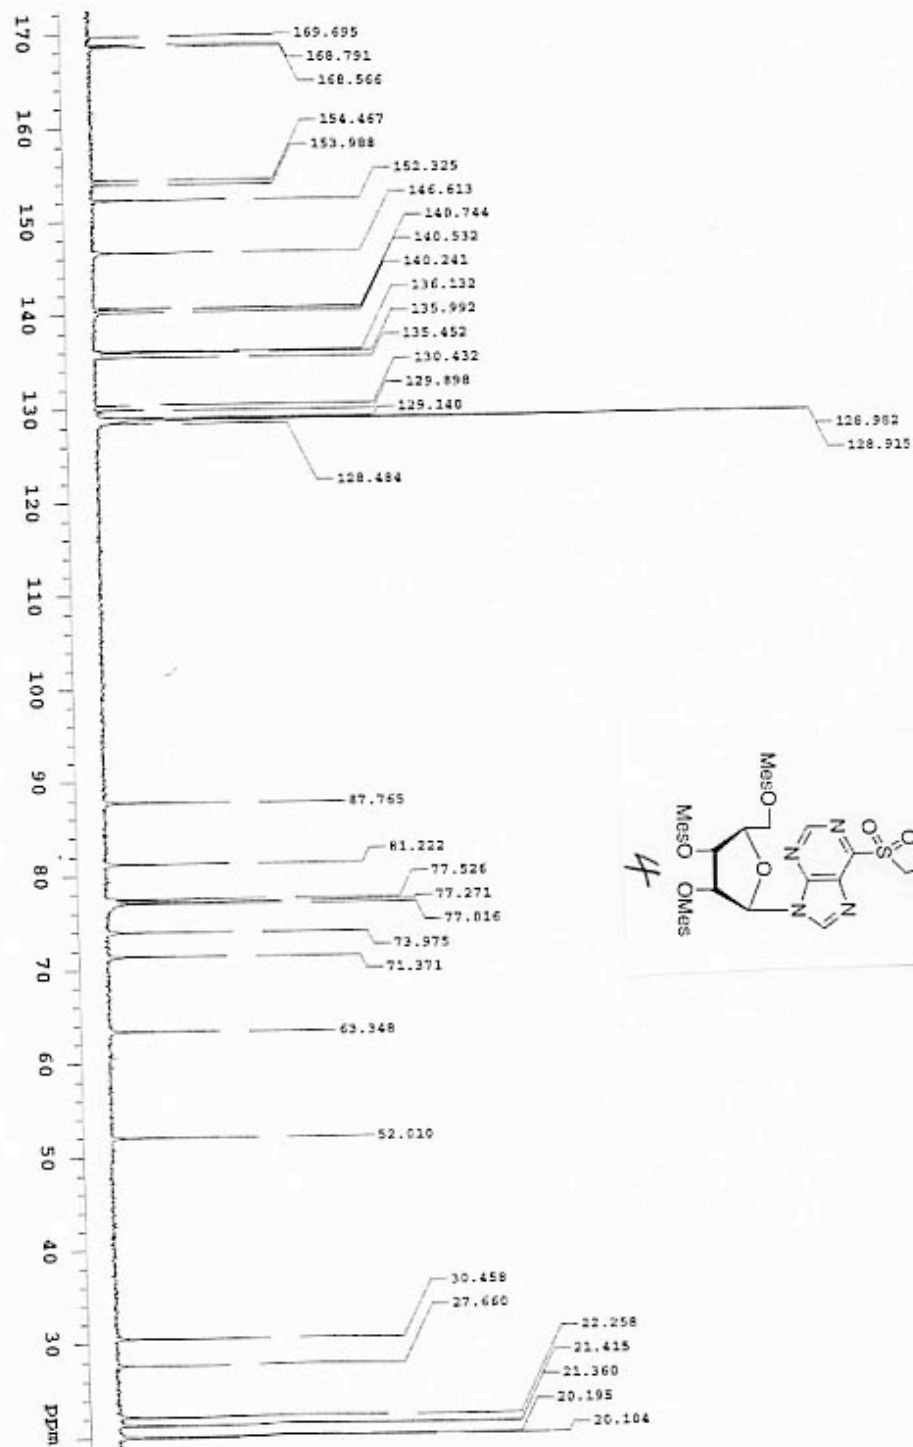

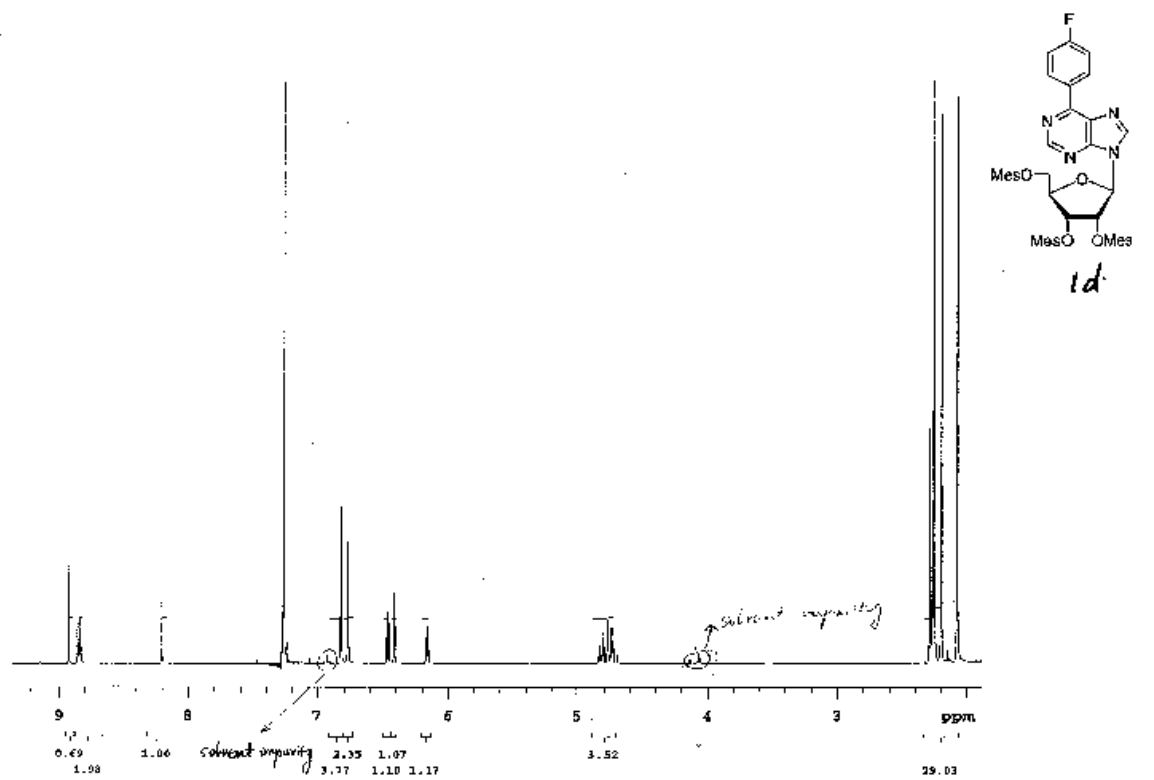

Supplement: Supplementary file 1 [file 5133898]
